# Supplementary material for: Brown rat demography reveals pre-commensal structure in eastern Asia before expansion into Southeast Asia
Source: HighWire-hosted journal article supplement (doi:10.1101/gr.235754.118), 2019-03-25
Supplement: Supplemental_Code.docx [file Supplemental_Code.docx]

**SUPPLEMENTAL CODE**

Input files (.tpl and .est) for each fastsimcoal2 model run to identify the global demographic history of brown rats (*Rattus norvegicus*). The fastsimcoal2 command used for all models was:

fsc26 -t ./7pop.tpl -e ./7pop.est -n 100000 -N 100000 -M 0.001 -d -l 10 -L 50 -x -c8

**Asian and Pacific Alternative Topology Models with WGS data (Figure S3)**

**Model1.tpl**

//Parameters for the coalescence simulation program : fastsimcoal.exe

4

//Population effective sizes (number of genes=2*NumIndividuals):

Nchina

Nsea

Naleu

Nwna

//Samples sizes and samples age

2

2

1

1

//Growth rates : negative growth implies population expansion

0

0

0

0

//Number of migration matrices : 0 implies no migration between demes

0

//historical event: time, source, sink, migrants, new deme size, new growth rate, migration mat$

3 historical event

Twna 3 2 1 1 0 0

Taleu 2 0 1 1 0 0

Tsea 1 0 1 1 0 0

//Number of independent loci [chromosome]

1 0

//Per chromosome: Number of contiguous linkage Block: a block is a set of contiguous loci

1

//per Block:data type, number of loci, per generation recombination and mutation rates and opti$

FREQ 1 0 2.5e-8 OUTEXP

Model1.est

// Priors and rules file

[PARAMETERS]

//#isInt? #name #dist.#min #max

//all Ns are in number of haploid individuals

1 Tsea unif 1000 200000 output bounded

1 Twna unif 1 200000 output

1 Taleu unif 1 200000 output

1 Nchina unif 100 50000 output

1 Nsea unif 100 50000 output

1 Nwna unif 100 50000 output

1 Naleu unif 100 50000 output

[RULES]

Taleu > Twna

[COMPLEX PARAMETERS]

**Model2.tpl**

//Parameters for the coalescence simulation program : fastsimcoal.exe

4

//Population effective sizes (number of genes=2*NumIndividuals):

Nchina

Nsea

Naleu

Nwna

//Samples sizes and samples age

2

2

1

1

//Growth rates : negative growth implies population expansion

0

0

0

0

//Number of migration matrices : 0 implies no migration between demes

0

//historical event: time, source, sink, migrants, new deme size, new growth rate, migration mat$

3 historical event

Twna 3 0 1 1 0 0

Taleu 2 0 1 1 0 0

Tsea 1 0 1 1 0 0

//Number of independent loci [chromosome]

1 0

//Per chromosome: Number of contiguous linkage Block: a block is a set of contiguous loci

1

//per Block:data type, number of loci, per generation recombination and mutation rates and opti$

FREQ 1 0 2.5e-8 OUTEXP

Model2.est

// Priors and rules file

[PARAMETERS]

//#isInt? #name #dist.#min #max

//all Ns are in number of haploid individuals

1 Tsea unif 1000 200000 output bounded

1 Twna unif 1 200000 output

1 Taleu unif 1 200000 output

1 Nchina unif 100 50000 output

1 Nsea unif 100 50000 output

1 Nwna unif 100 50000 output

1 Naleu unif 100 50000 output

[RULES]

[COMPLEX PARAMETERS]

**Model3.tpl**

//Parameters for the coalescence simulation program : fastsimcoal.exe

4

//Population effective sizes (number of genes=2*NumIndividuals):

Nchina

Nsea

Naleu

Nwna

//Samples sizes and samples age

2

2

1

1

//Growth rates : negative growth implies population expansion

0

0

0

0

//Number of migration matrices : 0 implies no migration between demes

0

//historical event: time, source, sink, migrants, new deme size, new growth rate, migration mat$

3 historical event

Twna 3 2 1 1 0 0

Taleu 2 1 1 1 0 0

Tsea 1 0 1 1 0 0

//Number of independent loci [chromosome]

1 0

//Per chromosome: Number of contiguous linkage Block: a block is a set of contiguous loci

1

//per Block:data type, number of loci, per generation recombination and mutation rates and opti$

FREQ 1 0 2.5e-8 OUTEXP

Model3.est

// Priors and rules file

[PARAMETERS]

//#isInt? #name #dist.#min #max

//all Ns are in number of haploid individuals

1 Tsea unif 1000 200000 output bounded

1 Twna unif 1 200000 output

1 Taleu unif 1 200000 output

1 Nchina unif 100 50000 output

1 Nsea unif 100 50000 output

1 Nwna unif 100 50000 output

1 Naleu unif 100 50000 output

[RULES]

Tsea>Taleu

Taleu>Twna

[COMPLEX PARAMETERS]

**Model4.tpl**

//Parameters for the coalescence simulation program : fastsimcoal.exe

4

//Population effective sizes (number of genes=2*NumIndividuals):

Nchina

Nsea

Naleu

Nwna

//Samples sizes and samples age

2

2

1

1

//Growth rates : negative growth implies population expansion

0

0

0

0

//Number of migration matrices : 0 implies no migration between demes

0

//historical event: time, source, sink, migrants, new deme size, new growth rate, migration mat$

3 historical event

Twna 3 2 1 1 0 0

Taleu 2 0 1 1 0 0

Tsea 0 1 1 1 0 0

//Number of independent loci [chromosome]

1 0

//Per chromosome: Number of contiguous linkage Block: a block is a set of contiguous loci

1

//per Block:data type, number of loci, per generation recombination and mutation rates and opti$

FREQ 1 0 2.5e-8 OUTEXP

Model4.est

// Priors and rules file

[PARAMETERS]

//#isInt? #name #dist.#min #max

//all Ns are in number of haploid individuals

1 Tsea unif 1000 200000 output

1 Twna unif 1 200000 output

1 Taleu unif 1 200000 output

1 Nchina unif 100 50000 output

1 Nsea unif 100 50000 output

1 Nwna unif 100 50000 output

1 Naleu unif 100 50000 output

[RULES]

Taleu > Twna

Tsea > Taleu

[COMPLEX PARAMETERS]

**Model5.tpl**

//Parameters for the coalescence simulation program : fastsimcoal.exe

4

//Population effective sizes (number of genes=2*NumIndividuals):

Nchina

Nsea

Naleu

Nwna

//Samples sizes and samples age

2

2

1

1

//Growth rates : negative growth implies population expansion

0

0

0

0

//Number of migration matrices : 0 implies no migration between demes

0

//historical event: time, source, sink, migrants, new deme size, new growth rate, migration mat$

3 historical event

Twna 3 2 1 1 0 0

Taleu 2 1 1 1 0 0

Tsea 0 1 1 1 0 0

//Number of independent loci [chromosome]

1 0

//Per chromosome: Number of contiguous linkage Block: a block is a set of contiguous loci

1

//per Block:data type, number of loci, per generation recombination and mutation rates and opti$

FREQ 1 0 2.5e-8 OUTEXP

Model5.est

// Priors and rules file

[PARAMETERS]

//#isInt? #name #dist.#min #max

//all Ns are in number of haploid individuals

1 Tsea unif 1000 200000 output

1 Twna unif 1 200000 output

1 Taleu unif 1 200000 output

1 Nchina unif 100 50000 output

1 Nsea unif 100 50000 output

1 Nwna unif 100 50000 output

1 Naleu unif 100 50000 output

[RULES]

Taleu > Twna

[COMPLEX PARAMETERS]

**Model6.tpl**

//Parameters for the coalescence simulation program : fastsimcoal.exe

5

//Population effective sizes (number of genes=2*NumIndividuals):

Nchina

Nsea

Naleu

Nwna

Nghost

//Samples sizes and samples age

2

2

1

1

0

//Growth rates : negative growth implies population expansion

0

0

0

0

0

//Number of migration matrices : 0 implies no migration between demes

0

//historical event: time, source, sink, migrants, new deme size, new growth rate, migration mat$

4 historical event

Twna 3 2 1 1 0 0

Taleu 2 4 1 1 0 0

Tsea 1 4 1 1 0 0

Tchina 0 4 1 1 0 0

//Number of independent loci [chromosome]

1 0

//Per chromosome: Number of contiguous linkage Block: a block is a set of contiguous loci

1

//per Block:data type, number of loci, per generation recombination and mutation rates and opti$

FREQ 1 0 2.5e-8 OUTEXP

Model6.est

// Priors and rules file

[PARAMETERS]

//#isInt? #name #dist.#min #max

//all Ns are in number of haploid individuals

1 Tsea unif 1000 200000 output

1 Twna unif 1 200000 output

1 Taleu unif 1 200000 output

1 Tchina unif 1 200000 output

1 Nchina unif 100 50000 output

1 Nsea unif 100 50000 output

1 Nwna unif 100 50000 output

1 Naleu unif 100 50000 output

1 Nghost unif 100 50000 output

[RULES]

Taleu > Twna

[COMPLEX PARAMETERS]

**Model7.tpl**

//Parameters for the coalescence simulation program : fastsimcoal.exe

5

//Population effective sizes (number of genes=2*NumIndividuals):

Nchina

Nsea

Naleu

Nwna

Nghost

//Samples sizes and samples age

2

2

1

1

0

//Growth rates : negative growth implies population expansion

0

0

0

0

0

//Number of migration matrices : 0 implies no migration between demes

0

//historical event: time, source, sink, migrants, new deme size, new growth rate, migration mat$

4 historical event

Twna 3 2 1 1 0 0

Taleu 2 4 1 1 0 0

Tsea 1 0 1 1 0 0

Tchina 0 4 1 1 0 0

//Number of independent loci [chromosome]

1 0

//Per chromosome: Number of contiguous linkage Block: a block is a set of contiguous loci

1

//per Block:data type, number of loci, per generation recombination and mutation rates and opti$

FREQ 1 0 2.5e-8 OUTEXP

Model7.est

// Priors and rules file

[PARAMETERS]

//#isInt? #name #dist.#min #max

//all Ns are in number of haploid individuals

1 Tsea unif 1000 200000 output

1 Twna unif 1 200000 output

1 Taleu unif 1 200000 output

1 Tchina unif 1 200000 output

1 Nchina unif 100 50000 output

1 Nsea unif 100 50000 output

1 Nwna unif 100 50000 output

1 Naleu unif 100 50000 output

1 Nghost unif 100 50000 output

[RULES]

Taleu > Twna

Tchina > Tsea

[COMPLEX PARAMETERS]

**Model8.tpl**

//Parameters for the coalescence simulation program : fastsimcoal.exe

5

//Population effective sizes (number of genes=2*NumIndividuals):

Nchina

Nsea

Naleu

Nwna

Nghost

//Samples sizes and samples age

2

2

1

1

0

//Growth rates : negative growth implies population expansion

0

0

0

0

0

//Number of migration matrices : 0 implies no migration between demes

0

//historical event: time, source, sink, migrants, new deme size, new growth rate, migration mat$

4 historical event

Twna 3 2 1 1 0 0

Taleu 2 1 1 1 0 0

Tsea 1 4 1 1 0 0

Tchina 0 4 1 1 0 0

//Number of independent loci [chromosome]

1 0

//Per chromosome: Number of contiguous linkage Block: a block is a set of contiguous loci

1

//per Block:data type, number of loci, per generation recombination and mutation rates and opti$

FREQ 1 0 2.5e-8 OUTEXP

Model8.est

// Priors and rules file

[PARAMETERS]

//#isInt? #name #dist.#min #max

//all Ns are in number of haploid individuals

1 Tsea unif 1000 200000 output

1 Twna unif 1 200000 output

1 Taleu unif 1 200000 output

1 Tchina unif 1 200000 output

1 Nchina unif 100 50000 output

1 Nsea unif 100 50000 output

1 Nwna unif 100 50000 output

1 Naleu unif 100 50000 output

1 Nghost unif 100 50000 output

[RULES]

Taleu > Twna

Tsea > Taleu

[COMPLEX PARAMETERS]

**Model9.tpl**

//Parameters for the coalescence simulation program : fastsimcoal.exe

5

//Population effective sizes (number of genes=2*NumIndividuals):

Nchina

Nsea

Naleu

Nwna

Nghost

//Samples sizes and samples age

2

2

1

1

0

//Growth rates : negative growth implies population expansion

0

0

0

0

0

//Number of migration matrices : 0 implies no migration between demes

0

//historical event: time, source, sink, migrants, new deme size, new growth rate, migration mat$

4 historical event

Twna 3 2 1 1 0 0

Taleu 2 4 1 1 0 0

Tchina 0 1 1 1 0 0

Tsea 1 4 1 1 0 0

//Number of independent loci [chromosome]

1 0

//Per chromosome: Number of contiguous linkage Block: a block is a set of contiguous loci

1

//per Block:data type, number of loci, per generation recombination and mutation rates and opti$

FREQ 1 0 2.5e-8 OUTEXP

Model9.est

// Priors and rules file

[PARAMETERS]

//#isInt? #name #dist.#min #max

//all Ns are in number of haploid individuals

1 Tsea unif 1000 200000 output

1 Twna unif 1 200000 output

1 Taleu unif 1 200000 output

1 Tchina unif 1 200000 output

1 Nchina unif 100 50000 output

1 Nsea unif 100 50000 output

1 Nwna unif 100 50000 output

1 Naleu unif 100 50000 output

1 Nghost unif 100 50000 output

[RULES]

Taleu > Twna

Tsea > Tchina

[COMPLEX PARAMETERS]

**Model10.tpl**

//Parameters for the coalescence simulation program : fastsimcoal.exe

5

//Population effective sizes (number of genes=2*NumIndividuals):

Nchina

Nsea

Naleu

Nwna

Nghost

//Samples sizes and samples age

2

2

1

1

0

//Growth rates : negative growth implies population expansion

0

0

0

0

0

//Number of migration matrices : 0 implies no migration between demes

0

//historical event: time, source, sink, migrants, new deme size, new growth rate, migration mat$

4 historical event

Twna 3 2 1 1 0 0

Taleu 2 1 1 1 0 0

Tchina 0 1 1 1 0 0

Tsea 1 4 1 1 0 0

//Number of independent loci [chromosome]

1 0

//Per chromosome: Number of contiguous linkage Block: a block is a set of contiguous loci

1

//per Block:data type, number of loci, per generation recombination and mutation rates and opti$

FREQ 1 0 2.5e-8 OUTEXP

Model10.est

// Priors and rules file

[PARAMETERS]

//#isInt? #name #dist.#min #max

//all Ns are in number of haploid individuals

1 Tsea unif 1000 200000 output

1 Twna unif 1 200000 output

1 Taleu unif 1 200000 output

1 Tchina unif 1 200000 output

1 Nchina unif 100 50000 output

1 Nsea unif 100 50000 output

1 Nwna unif 100 50000 output

1 Naleu unif 100 50000 output

1 Nghost unif 100 50000 output

[RULES]

Taleu > Twna

Tsea > Taleu

Tsea > Tchina

[COMPLEX PARAMETERS]

**Non-Asian Alternative Topology Models with WGS data (Figure S4)**

**Model1.tpl**

//Parameters for the coalescence simulation program : fastsimcoal.exe

5

//Population effective sizes (number of genes=2*NumIndividuals):

Nsea

Nwe

Nne

Nnyc

Nmid

//Samples sizes and samples age

2

2

2

2

2

//Growth rates : negative growth implies population expansion

0

0

0

0

0

//Number of migration matrices : 0 implies no migration between demes

0

//historical event: time, source, sink, migrants, new deme size, new growth rate, migration mat$

4 historical event

Tnyc 3 1 1 1 0 0

Tne 2 1 1 1 0 0

Twe 1 4 1 1 0 0

Tmid 4 0 1 1 0 0

//Number of independent loci [chromosome]

1 0

//Per chromosome: Number of contiguous linkage Block: a block is a set of contiguous loci

1

//per Block:data type, number of loci, per generation recombination and mutation rates and opti$

FREQ 1 0 RATE OUTEXP

Model1.est

// Priors and rules file

[PARAMETERS]

//#isInt? #name #dist.#min #max

//all Ns are in number of haploid individuals

1 Tnyc unif 400 1600 output bounded

1 Tne unif 400 2000 output

1 AA unif 1 1000 hide

1 BB unif 1 1000 hide

1 Nsea unif 100 50000 output

1 Nwe unif 100 50000 output

1 Nne unif 100 50000 output

1 Nnyc unif 100 50000 output

1 Nmid unif 100 50000 output

0 RATE unif 1e-9 1e-7 output bounded

[RULES]

Tne > Tnyc

[COMPLEX PARAMETERS]

1 Twe = Tne+AA output

1 Tmid = Twe+BB output

**Model2.tpl**

//Parameters for the coalescence simulation program : fastsimcoal.exe

5

//Population effective sizes (number of genes=2*NumIndividuals):

Nsea

Nwe

Nne

Nnyc

Nmid

//Samples sizes and samples age

2

2

2

2

2

//Growth rates : negative growth implies population expansion

0

0

0

0

0

//Number of migration matrices : 0 implies no migration between demes

0

//historical event: time, source, sink, migrants, new deme size, new growth rate, migration mat$

4 historical event

Tnyc 3 1 1 1 0 0

Twe 1 2 1 1 0 0

Tne 2 4 1 1 0 0

Tmid 4 0 1 1 0 0

//Number of independent loci [chromosome]

1 0

//Per chromosome: Number of contiguous linkage Block: a block is a set of contiguous loci

1

//per Block:data type, number of loci, per generation recombination and mutation rates and opti$

FREQ 1 0 RATE OUTEXP

Model2.est

// Priors and rules file

[PARAMETERS]

//#isInt? #name #dist.#min #max

//all Ns are in number of haploid individuals

1 Tnyc unif 400 1600 output bounded

1 AA unif 1 1000 hide

1 BB unif 1 1000 hide

1 CC unif 1 1000 hide

1 Nsea unif 100 50000 output

1 Nwe unif 100 50000 output

1 Nne unif 100 50000 output

1 Nnyc unif 100 50000 output

1 Nmid unif 100 50000 output

0 RATE unif 1e-9 1e-7 output bounded

[RULES]

[COMPLEX PARAMETERS]

1 Twe = Tnyc+AA output

1 Tne = Twe+BB output

1 Tmid = Tne+CC output

**Model3.tpl**

//Parameters for the coalescence simulation program : fastsimcoal.exe

5

//Population effective sizes (number of genes=2*NumIndividuals):

Nsea

Nwe

Nne

Nnyc

Nmid

//Samples sizes and samples age

2

2

2

2

2

//Growth rates : negative growth implies population expansion

0

0

0

0

0

//Number of migration matrices : 0 implies no migration between demes

0

//historical event: time, source, sink, migrants, new deme size, new growth rate, migration mat$

4 historical event

Tnyc 3 1 1 1 0 0

Twe 2 0 1 1 0 0

Twe 1 4 1 1 0 0

Tmid 4 0 1 1 0 0

//Number of independent loci [chromosome]

1 0

//Per chromosome: Number of contiguous linkage Block: a block is a set of contiguous loci

1

//per Block:data type, number of loci, per generation recombination and mutation rates and opti$

FREQ 1 0 RATE OUTEXP

Model3.est

// Priors and rules file

[PARAMETERS]

//#isInt? #name #dist.#min #max

//all Ns are in number of haploid individuals

1 Tnyc unif 400 1600 output bounded

1 AA unif 1 1000 hide

1 BB unif 1 1000 hide

1 Nsea unif 100 50000 output

1 Nwe unif 100 50000 output

1 Nne unif 100 50000 output

1 Nnyc unif 100 50000 output

1 Nmid unif 100 50000 output

0 RATE unif 1e-9 1e-7 output bounded

[RULES]

[COMPLEX PARAMETERS]

1 Twe = Tnyc+AA output

1 Tmid = Twe+BB output

**Model4.tpl**

//Parameters for the coalescence simulation program : fastsimcoal.exe

5

//Population effective sizes (number of genes=2*NumIndividuals): China, SE Asia, Western Europe$

Nsea

Nwe

Nne

Nnyc

Nmid

//Samples sizes and samples age

2

2

2

2

2

//Growth rates : negative growth implies population expansion

0

0

0

0

0

//Number of migration matrices : 0 implies no migration between demes

0

//historical event: time, source, sink, migrants, new deme size, new growth rate, migration mat$

4 historical event

Tnyc 3 1 1 1 0 0

Tne 2 4 1 1 0 0

Twe 1 4 1 1 0 0

Tmid 4 0 1 1 0 0

//Number of independent loci [chromosome]

1 0

//Per chromosome: Number of contiguous linkage Block: a block is a set of contiguous loci

1

//per Block:data type, number of loci, per generation recombination and mutation rates and opti$

FREQ 1 0 RATE OUTEXP

Model4.est

// Priors and rules file

[PARAMETERS]

//#isInt? #name #dist.#min #max

//all Ns are in number of haploid individuals

1 Tnyc unif 400 1600 output bounded

1 Twe unif 400 2000 output

1 Tne unif 400 2000 output

1 Tmid unif 400 2000 output

1 Nsea unif 100 50000 output

1 Nwe unif 100 50000 output

1 Nne unif 100 50000 output

1 Nnyc unif 100 50000 output

1 Nmid unif 100 50000 output

0 RATE unif 1e-9 1e-7 output bounded

[RULES]

Twe > Tnyc

Tmid > Tne

Tmid > Twe

[COMPLEX PARAMETERS]

**Full WGS Model (Appendix 1)**

**No Rates**

.tpl

//Parameters for the coalescence simulation program : fastsimcoal.exe

9

//Population effective sizes (number of genes=2*NumIndividuals): China, SE Asia, Western Europe, Northern Europe, NYC/expansion

Nchina

Nsea

Nwe

Nne

Nnyc

Naleu

Nwna

Niran

Nghost

//Samples sizes and samples age

2

2

2

2

2

1

1

2

0

//Growth rates : negative growth implies population expansion

0

0

0

0

0

0

0

0

0

//Number of migration matrices : 0 implies no migration between demes

0

//historical event: time, source, sink, migrants, new deme size, new growth rate, migration matrix index

8 historical event

Tnyc 4 2 1 1 0 0

Tne 3 2 1 1 0 0

Twe 2 7 1 1 0 0

Tmid 7 1 1 1 0 0

Tsea 1 8 1 1 0 0

Taleu 5 6 1 1 0 0

Twna 6 8 1 1 0 0

Tchina 0 8 1 1 0 0

//Number of independent loci [chromosome]

1 0

//Per chromosome: Number of contiguous linkage Block: a block is a set of contiguous loci

1

//per Block:data type, number of loci, per generation recombination and mutation rates and optional parameters

FREQ 1 0 RATE OUTEXP

.est

// Priors and rules file

[PARAMETERS]

//#isInt? #name #dist.#min #max

//all Ns are in number of haploid individuals

1 Tnyc unif 400 1600 output bounded

1 Tne unif 400 1600 output

1 Tchina unif 1000 200000 output

1 Taleu unif 400 10000 output

1 YY unif 1 10000 hide

1 ZZ unif 1 10000 hide

1 AA unif 1 1000 hide

1 BB unif 1 1000 hide

1 Nchina unif 100 50000 output

1 Nsea unif 100 50000 output

1 Nwe unif 100 50000 output

1 Nne unif 100 50000 output

1 Nnyc unif 100 50000 output

1 Naleu unif 100 50000 output

1 Nwna unif 100 50000 output

1 Nghost unif 100 50000 output

1 Niran unif 100 50000 output

0 RATE unif 1e-9 1e-7 output bounded

[RULES]

Tne > Tnyc

[COMPLEX PARAMETERS]

1 Twe = Tne+AA output

1 Tmid = Twe+BB output

1 Tsea = Tmid+YY output

1 Twna = Taleu+ZZ output

**Recent-All**

.tpl

//Parameters for the coalescence simulation program : fastsimcoal.exe

9

//Population effective sizes (number of genes=2*NumIndividuals):

Nchina

Nsea

Nwe

Nne

Nnyc

Naleu

Nwna

Niran

Nghost

//Samples sizes and samples age

2

2

2

2

2

1

1

2

0

//Growth rates : negative growth implies population expansion

Rchina

Rsea

Rwe

Rne

Rnyc

Raleu

Rwna

Riran

Rghost

//Number of migration matrices : 0 implies no migration between demes

0

//historical event: time, source, sink, migrants, new deme size, new growth rate, migration matrix index

8 historical event

Tnyc 4 2 1 1 0 0

Tne 3 2 1 1 0 0

Twe 2 7 1 1 0 0

Tiran 7 1 1 1 0 0

Tsea 1 8 1 1 0 0

Taleu 5 6 1 1 0 0

Twna 6 8 1 1 0 0

Tchina 0 8 1 1 0 0

//Number of independent loci [chromosome]

1 0

//Per chromosome: Number of contiguous linkage Block: a block is a set of contiguous loci

1

//per Block:data type, number of loci, per generation recombination and mutation rates and optional parameters

FREQ 1 0 RATE OUTEXP

.est

// Priors and rules file

[PARAMETERS]

//#isInt? #name #dist.#min #max

//all Ns are in number of haploid individuals

1 Tnyc unif 400 1600 output bounded

1 Tne unif 400 1600 output

1 Tchina unif 1000 200000 output

1 Taleu unif 400 10000 output

1 YY unif 1 10000 hide

1 ZZ unif 1 10000 hide

1 AA unif 1 1000 hide

1 BB unif 1 1000 hide

1 Nchina unif 100 50000 output

1 Nsea unif 100 50000 output

1 Nwe unif 100 50000 output

1 Nne unif 100 50000 output

1 Nnyc unif 100 50000 output

1 Naleu unif 100 50000 output

1 Nwna unif 100 50000 output

1 Nghost unif 100 50000 output

1 Niran unif 100 50000 output

0 Rsea unif -1e-4 0 output bounded

0 Rwe unif -1e-4 0 output bounded

0 Rne unif -1e-4 0 output bounded

0 Rnyc unif -1e-4 0 output bounded

0 Rwna unif -1e-4 0 output bounded

0 Riran unif -1e-4 0 output bounded

0 Raleu unif -1e-4 0 output bounded

0 Rghost unif -1e-4 0 output bounded

0 Rchina unif -1e-4 0 output bounded

0 RATE unif 1e-9 1e-7 output bounded

[RULES]

Tne > Tnyc

[COMPLEX PARAMETERS]

1 Twe = Tne+AA output

1 Tiran = Twe+BB output

1 Tsea = Tiran+YY output

1 Twna = Taleu+ZZ output

**Ancestral**

.tpl

//Parameters for the coalescence simulation program : fastsimcoal.exe

9

//Population effective sizes (number of genes=2*NumIndividuals):

Nchina

Nsea

Nwe

Nne

Nnyc

Naleu

Nwna

Niran

Nghost

//Samples sizes and samples age

2

2

2

2

2

1

1

2

0

//Growth rates : negative growth implies population expansion

0

0

0

0

0

0

0

0

0

//Number of migration matrices : 0 implies no migration between demes

0

//historical event: time, source, sink, migrants, new deme size, new growth rate, migration matrix index

10 historical event

Tnyc 4 2 1 1 0 0

Tne 3 2 1 1 0 0

Twe 2 7 1 1 0 0

Tiran 7 1 1 1 0 0

Tsea 1 8 1 1 0 0

Tsea 0 0 1 1 Ranc 0

Tsea 8 8 1 1 Ranc 0

Taleu 5 6 1 1 Rpac 0

Twna 6 8 1 1 0 0

Tchina 0 8 1 1 0 0

//Number of independent loci [chromosome]

1 0

//Per chromosome: Number of contiguous linkage Block: a block is a set of contiguous loci

1

//per Block:data type, number of loci, per generation recombination and mutation rates and optional parameters

FREQ 1 0 RATE OUTEXP

.est

// Priors and rules file

[PARAMETERS]

//#isInt? #name #dist.#min #max

//all Ns are in number of haploid individuals

1 Tnyc unif 400 1600 output bounded

1 Tne unif 400 1600 output

1 Tchina unif 1000 200000 output

1 Taleu unif 400 10000 output

1 YY unif 1 10000 hide

1 ZZ unif 1 10000 hide

1 AA unif 1 1000 hide

1 BB unif 1 1000 hide

1 Nchina unif 100 50000 output

1 Nsea unif 100 50000 output

1 Nwe unif 100 50000 output

1 Nne unif 100 50000 output

1 Nnyc unif 100 50000 output

1 Naleu unif 100 50000 output

1 Nwna unif 100 50000 output

1 Nghost unif 100 50000 output

1 Niran unif 100 50000 output

0 Ranc unif 0 1e-4 output bounded

0 Rpac unif 0 1e-4 output bounded

0 RATE unif 1e-9 1e-7 output bounded

[RULES]

Tne > Tnyc

ANCchina > Nchina

[COMPLEX PARAMETERS]

1 Twe = Tne+AA output

1 Tiran = Twe+BB output

1 Tsea = Tiran+YY output

1 Twna = Taleu+ZZ output

**Recent Subset + Ancestral (Figure 3)**

.tpl

//Parameters for the coalescence simulation program : fastsimcoal.exe

9

//Population effective sizes (number of genes=2*NumIndividuals): China, SE Asia, Western Europe, Northern Europe, NYC/expansion

Nchina

Nsea

Nwe

Nne

Nnyc

Naleu

Nwna

Niran

Nghost

//Samples sizes and samples age

2

2

2

2

2

1

1

2

0

//Growth rates : negative growth implies population expansion

Rchina

Rchina

Rchina

Rchina

Rchina

Raleu

Raleu

Rchina

Rghost

//Number of migration matrices : 0 implies no migration between demes

0

//historical event: time, source, sink, migrants, new deme size, new growth rate, migration matrix index

10 historical event

Tnyc 4 2 1 1 0 0

Tne 3 2 1 1 0 0

Twe 2 7 1 1 0 0

Tiran 7 1 1 1 0 0

Tsea 1 8 1 1 0 0

Tsea 0 0 1 1 Ranc 0

Tsea 8 8 1 1 Ranc 0

Taleu 5 6 1 1 Rpac 0

Twna 6 8 1 1 0 0

Tchina 0 8 1 1 0 0

//Number of independent loci [chromosome]

1 0

//Per chromosome: Number of contiguous linkage Block: a block is a set of contiguous loci

1

//per Block:data type, number of loci, per generation recombination and mutation rates and optional parameters

FREQ 1 0 RATE OUTEXP

.est

// Priors and rules file

[PARAMETERS]

//#isInt? #name #dist.#min #max

//all Ns are in number of haploid individuals

1 Tnyc unif 400 1600 output bounded

1 Tne unif 400 1600 output

1 Tchina unif 1000 200000 output

1 Taleu unif 400 10000 output

1 YY unif 1 10000 hide

1 ZZ unif 1 10000 hide

1 AA unif 1 1000 hide

1 BB unif 1 1000 hide

1 Nchina unif 100 50000 output

1 Nsea unif 100 50000 output

1 Nwe unif 100 50000 output

1 Nne unif 100 50000 output

1 Nnyc unif 100 50000 output

1 Naleu unif 100 50000 output

1 Nwna unif 100 50000 output

1 Nghost unif 100 50000 output

1 Niran unif 100 50000 output

0 Raleu unif -1e-4 0 output bounded

0 Rghost unif -1e-4 0 output bounded

0 Rchina unif -1e-4 0 output bounded

0 Ranc unif 0 1e-4 output bounded

0 Rpac unif 0 1e-4 output bounded

0 RATE unif 1e-9 1e-7 output bounded

[RULES]

Tne > Tnyc

[COMPLEX PARAMETERS]

1 Twe = Tne+AA output

1 Tiran = Twe+BB output

1 Tsea = Tiran+YY output

1 Twna = Taleu+ZZ output

**Recent All + Ancestral**

.tpl

//Parameters for the coalescence simulation program : fastsimcoal.exe

9

//Population effective sizes (number of genes=2*NumIndividuals): China, SE Asia, Western Europe, Northern Europe, NYC/expansion

Nchina

Nsea

Nwe

Nne

Nnyc

Naleu

Nwna

Niran

Nghost

//Samples sizes and samples age

2

2

2

2

2

1

1

2

0

//Growth rates : negative growth implies population expansion

Rchina

Rsea

Rwe

Rne

Rnyc

Raleu

Rwna

Riran

Rghost

//Number of migration matrices : 0 implies no migration between demes

0

//historical event: time, source, sink, migrants, new deme size, new growth rate, migration matrix index

10 historical event

Tnyc 4 2 1 1 0 0

Tne 3 2 1 1 0 0

Twe 2 7 1 1 0 0

Tiran 7 1 1 1 0 0

Tsea 1 8 1 1 0 0

Tsea 0 0 1 1 Ranc 0

Tsea 8 8 1 1 Ranc 0

Taleu 5 6 1 1 Rpac 0

Twna 6 8 1 1 0 0

Tchina 0 8 1 1 0 0

//Number of independent loci [chromosome]

1 0

//Per chromosome: Number of contiguous linkage Block: a block is a set of contiguous loci

1

//per Block:data type, number of loci, per generation recombination and mutation rates and optional parameters

FREQ 1 0 RATE OUTEXP

.est

// Priors and rules file

[PARAMETERS]

//#isInt? #name #dist.#min #max

//all Ns are in number of haploid individuals

1 Tnyc unif 400 1600 output bounded

1 Tne unif 400 1600 output

1 Tchina unif 1000 200000 output

1 Taleu unif 400 10000 output

1 YY unif 1 10000 hide

1 ZZ unif 1 10000 hide

1 AA unif 1 1000 hide

1 BB unif 1 1000 hide

1 Nchina unif 100 50000 output

1 Nsea unif 100 50000 output

1 Nwe unif 100 50000 output

1 Nne unif 100 50000 output

1 Nnyc unif 100 50000 output

1 Naleu unif 100 50000 output

1 Nwna unif 100 50000 output

1 Nghost unif 100 50000 output

1 Niran unif 100 50000 output

0 Rsea unif -1e-4 0 output bounded

0 Rwe unif -1e-4 0 output bounded

0 Rne unif -1e-4 0 output bounded

0 Rnyc unif -1e-4 0 output bounded

0 Rwna unif -1e-4 0 output bounded

0 Riran unif -1e-4 0 output bounded

0 Raleu unif -1e-4 0 output bounded

0 Rghost unif -1e-4 0 output bounded

0 Rchina unif -1e-4 0 output bounded

0 Ranc unif 0 1e-4 output bounded

0 Rpac unif 0 1e-4 output bounded

0 RATE unif 1e-9 1e-7 output bounded

[RULES]

Tne > Tnyc

[COMPLEX PARAMETERS]

1 Twe = Tne+AA output

1 Tiran = Twe+BB output

1 Tsea = Tiran+YY output

1 Twna = Taleu+ZZ output
