# Supplementary material for: Brown rat demography reveals pre-commensal structure in eastern Asia before expansion into Southeast Asia
Source: HighWire-hosted journal article supplement (doi:10.1101/gr.235754.118), 2019-03-25
Supplement: Supplemental_Table_S1.xlsx [file Supplemental_Table_S1.xlsx]

## Sheet: TableS1
Table S1- Strain and accession numbers of rat genomes analyzed.
Sample Name	Geographic Location	Genetic Background	Database	Accession	Depth	Source
R. rattus	Harbin, China	Black rat	ENA	ERP001276	33	Deinum et al. 2015
China13	Harbin, China	Eastern China	ENA	ERP001276	46	Deinum et al. 2015
China14	Harbin, China	Eastern China	ENA	ERP001276	23	Deinum et al. 2015
Iran5	Mahmudabad, Iran	Middle East	GSA	CRR021253	5.7	Zeng et al. 2018
Iran9	Mahmudabad, Iran	Middle East	GSA	CRR021262	5.8	Zeng et al. 2018
ALK20	Great Sitkin Island, USA	Aleutian	SRA	PRJNA344413	38	This study
CAL79	San Diego, USA	Western North America	SRA	PRJNA344413	38	This study
KHM07	Silhanouk, Cambodia	SE Asia	SRA	PRJNA344413	26	This study
PHL09	Tarlac, Philippines	SE Asia	SRA	PRJNA344413	24	This study
NLD21	Doetinchem, Netherlands	Northern Europe	SRA	PRJNA344413	28	This study
SWE35	Skelleftea, Sweden	Northern Europe	SRA	PRJNA344413	28	This study
FRA18	LePuy, France	Western Europe	SRA	PRJNA344413	26	This study
GBR11	Liverpool, England	Western Europe	SRA	PRJNA344413	25	This study
Rn246	New York City, USA	Western Europe- Expansion	SRA	PRJNA344413	23	This study
Rn255	New York City, USA	Western Europe- Expansion	SRA	PRJNA344413	26	This study
