# Supplementary material for: Brown rat demography reveals pre-commensal structure in eastern Asia before expansion into Southeast Asia
Source: HighWire-hosted journal article supplement (doi:10.1101/gr.235754.118), 2019-03-25
Supplement: Supplemental_Table_S2.xlsx [file Supplemental_Table_S2.xlsx]

## Sheet: TableS2
Table S2- Locations and sample sizes used for range expansion and/or regional population demographic models at a set of 32k SNPs (previously identified with ddRADseq).
Geographic Location	Sample Size	Provider
Buenos Aires, Argentina	7	Olga Suarez
Salvador, Brazil	5	Gisella Caccone
Pursat, Cambodia	4	Serge Morand / VetTech Kasetsart, Thailand
Sihanouk, Cambodia	5	Serge Morand / VetTech Kasetsart, Thailand
Haida Gwaii, Canada	11	Chelsea Himsworth
Vancouver , Canada	15	Chelsea Himsworth
El Oliveto, Chile	2	Museum of Southwestern Biology
Guangdong, China	5	Zeng et al (2018)
Harbin, China	10	ENA ERP001276
Hebei, China	5	Zeng et al (2018)
Heilongjiang, China	5	Zeng et al (2018)
Jiangxi, China	5	Zeng et al (2018)
Narati, China	2	Museum of Southwestern Biology
Qinghai, China	2	Zeng et al (2018)
Yunnan, China	5	Zeng et al (2018)
Zhejiang, China	2	Zeng et al (2018)
Turku, Finland	6	Tanja Strand / Åke Lundkvist / Thomas Persson Vinnersten
Marseille, France	8	IRD, Centre de Biologie pour la Gestion des Populations
Marseille, France	8	IRD, Centre de Biologie pour la Gestion des Populations
Möggingen, Germany	2	JKI Sample Collection for Resistance Monitoring
Sassenberg, Germany	2	JKI Sample Collection for Resistance Monitoring
Liverpool, Great Britain	7	Tim Giles
Nottingham, Great Britain	7	Patrick McClure
Juybar, Iran	2	Zeng et al (2018)
Mahmudabad, Iran	7	Zeng et al (2018)
Mazandaran Province, Iran	2	Zeng et al (2018)
Bamako, Mali	4	IRD, Centre de Biologie pour la Gestion des Populations
Doetinchem, Netherlands	12	Mare Lõhmus / Frank van de Goot / Tanja Strand
NorthIsland, New Zealand	7	James Russell
Bergen, Norway	7	Tanja Strand / Åke Lundkvist / Thomas Persson Vinnersten
Tarlac, Philippines	7	Serge Morand
Khabarovsk Krai, Russia	2	Zeng et al (2018)
near Kamensk, Russia	2	Zeng et al (2018)
Sakhalinskaya Oblast, Russia	6	University of Washington Burke Museum
Barcelona, Spain	8	Miguel Camacho and Doanna Biological Station
Göteborg, Sweden	8	Tanja Strand / Åke Lundkvist / Thomas Persson Vinnersten
Lövsta, Sweden	5	Annette Backhans / Tanja Strand
Malmö, Sweden	10	Tanja Strand / Åke Lundkvist / Thomas Persson Vinnersten
Skelleftea, Sweden	5	Tanja Strand / Åke Lundkvist / Thomas Persson Vinnersten
Stockholm, Sweden	5	Tanja Strand / Åke Lundkvist / Thomas Persson Vinnersten
Banpong Village, Thailand	2	Serge Morand / VetTech Kasetsart, Thailand
Udon Thani City, Thailand	6	Serge Morand / Alexis Ribas
Adak, USA	7	University of Alaska Museum of the North
Baltimore, USA	9	Sabra Klein / Greg Glass
Berkeley, USA	11	University of California- Berkeley Museum of Vertebrate Zoology
NYC, USA	10	Jason Munshi-South
San Diego, USA	9	Museum of Texas Tech University
Sonoma Valley, USA	12	Jordan Reed
Hanoi, Vietnam	4	J. Bryant
