# Supplementary material for: Brown rat demography reveals pre-commensal structure in eastern Asia before expansion into Southeast Asia
Source: HighWire-hosted journal article supplement (doi:10.1101/gr.235754.118), 2019-03-25
Supplement: Supplemental_Table_S3.xlsx [file Supplemental_Table_S3.xlsx]

## Sheet: TableS3
Table S3- All pairwise psi scores from the Range Expansion analysis using 45 sampling sites and 32k SNPs.
Pop1	Pop2	psi	Zscore	Pop1Long	Pop1Lat	RegionPop1	Pop2Long	Pop2Lat	RegionPop2
Baltimore	Adak	0.061547	12.1401	-76.612	39.29	EastAm	-176.75	51.75	Aleu
Bamako	Adak	-0.13588	-21.0158	-8	12.65	Africa	-176.75	51.75	Aleu
Banpong	Adak	-0.111266	-16.882	99.8711	13.8142	SEAsia	-176.75	51.75	Aleu
Barcelona	Adak	-0.0300288	-3.23913	2.173	41.385	WestEuro	-176.75	51.75	Aleu
BayArea	Adak	0.0854438	16.1533	-122.27	37.87	WestAm	-176.75	51.75	Aleu
Bergen	Adak	-0.132565	-20.4591	5.25959	60.2926	Scand	-176.75	51.75	Aleu
BuenosAires	Adak	0.0478471	9.83932	-34.603	-58.381	SouthAm	-176.75	51.75	Aleu
ElOliveto	Adak	-0.00880352	0.32544	-71	-33	SouthAm	-176.75	51.75	Aleu
Goteborg	Adak	0.0137396	4.11132	11.9667	57.7	Scand	-176.75	51.75	Aleu
Guangdong1	Adak	-0.198356	-31.5079	110.365	21.2575	Asia	-176.75	51.75	Aleu
HaidaGwaii	Adak	-0.304199	-49.2831	-132	53	HG	-176.75	51.75	Aleu
Hanoi	Adak	-0.0853285	-12.5261	105.854	21.0285	SEAsia	-176.75	51.75	Aleu
Hebei	Adak	-0.277554	-44.8084	114.894	40.8112	Asia	-176.75	51.75	Aleu
Heilongjiang	Adak	-0.185111	-29.2836	126.658	45.7732	Asia	-176.75	51.75	Aleu
Iran1	Adak	-0.313378	-50.8248	52.2453	36.6225	MidEast	-176.75	51.75	Aleu
Iran2	Adak	-0.17324	-27.29	52.9058	36.6442	MidEast	-176.75	51.75	Aleu
Iran4	Adak	-0.0321877	-3.60169	56.2667	27.1833	MidEast	-176.75	51.75	Aleu
Jiangxi	Adak	-0.000886146	1.65508	115.894	28.6896	Asia	-176.75	51.75	Aleu
Liverpool	Adak	0.0556794	11.1547	-2.94228	53.4704	WestEuro	-176.75	51.75	Aleu
Lovsta	Adak	-0.269732	-43.4948	17.8	59.8333	Scand	-176.75	51.75	Aleu
Malmo	Adak	-0.0087795	0.329473	13.0358	55.6058	Scand	-176.75	51.75	Aleu
Marseille	Adak	-0.00130068	1.58546	5.37	43.2964	WestEuro	-176.75	51.75	Aleu
Moggingen	Adak	-0.329844	-53.5899	10.6333	48.7833	WestEuro	-176.75	51.75	Aleu
Narati	Adak	-0.410367	-67.113	84.0129	43.3232	Asia	-176.75	51.75	Aleu
Netherlands	Adak	0.0446592	9.30395	5.9387	51.6928	WestEuro	-176.75	51.75	Aleu
Nottingham	Adak	0.0433701	9.08746	1.1333	52.95	WestEuro	-176.75	51.75	Aleu
NYC	Adak	0.0948556	17.7339	-73.9484	40.809	EastAm	-176.75	51.75	Aleu
Pursat	Adak	-0.0409905	-5.08004	103.917	12.5333	SEAsia	-176.75	51.75	Aleu
Qinghai	Adak	-0.0562298	-7.63932	101.768	36.6407	Asia	-176.75	51.75	Aleu
Russia2	Adak	-0.152632	-23.829	134.94	47.73	Russia	-176.75	51.75	Aleu
Russia3	Adak	-0.250962	-40.3426	106	52	Russia	-176.75	51.75	Aleu
SakhalinskayaOblast	Adak	-0.0827948	-12.1006	142.6	50.55	Asia	-176.75	51.75	Aleu
Salvador	Adak	0.0461379	9.55228	-38.501	-12.977	SouthAm	-176.75	51.75	Aleu
SanDiego	Adak	-0.185056	-29.2743	-117.161	32.715	WestAm	-176.75	51.75	Aleu
Sassenberg	Adak	-0.06388	-8.92409	8.0408	51.9897	WestEuro	-176.75	51.75	Aleu
Sihanouk	Adak	-0.167781	-26.3732	103.864	10.7153	SEAsia	-176.75	51.75	Aleu
Sonoma	Adak	-0.0164524	-0.959112	-122.45	38.29	EastAm	-176.75	51.75	Aleu
Stockholm	Adak	0.030932	6.9986	18.0686	59.3294	Scand	-176.75	51.75	Aleu
Tarlac	Adak	-0.096782	-14.4496	120.465	15.4636	SEAsia	-176.75	51.75	Aleu
Turku	Adak	0.0439535	9.18544	22.2667	60.45	Scand	-176.75	51.75	Aleu
UdonThani	Adak	-0.044242	-5.62609	102.75	17.4167	SEAsia	-176.75	51.75	Aleu
Vancouver	Adak	0.0195619	5.08912	-123.12	49.282	EastAm	-176.75	51.75	Aleu
Yunnan1	Adak	-0.313978	-50.9255	102.715	25.0492	Asia	-176.75	51.75	Aleu
Zhejiang	Adak	-0.284241	-45.9314	121.579	29.8853	Asia	-176.75	51.75	Aleu
Bamako	Baltimore	-0.196531	-31.2014	-8	12.65	Africa	-76.612	39.29	EastAm
Banpong	Baltimore	-0.170894	-26.8959	99.8711	13.8142	SEAsia	-76.612	39.29	EastAm
Barcelona	Baltimore	-0.0920853	-13.6609	2.173	41.385	WestEuro	-76.612	39.29	EastAm
BayArea	Baltimore	0.0253196	6.05606	-122.27	37.87	WestAm	-76.612	39.29	EastAm
Bergen	Baltimore	-0.194332	-30.8321	5.25959	60.2926	Scand	-76.612	39.29	EastAm
BuenosAires	Baltimore	-0.0134698	-0.45821	-34.603	-58.381	SouthAm	-76.612	39.29	EastAm
ElOliveto	Baltimore	-0.0679282	-9.60394	-71	-33	SouthAm	-76.612	39.29	EastAm
Goteborg	Baltimore	-0.0475815	-6.18692	11.9667	57.7	Scand	-76.612	39.29	EastAm
Guangdong1	Baltimore	-0.25365	-40.794	110.365	21.2575	Asia	-76.612	39.29	EastAm
HaidaGwaii	Baltimore	-0.360295	-58.7039	-132	53	HG	-76.612	39.29	EastAm
Hanoi	Baltimore	-0.144078	-22.3926	105.854	21.0285	SEAsia	-76.612	39.29	EastAm
Hebei	Baltimore	-0.327126	-53.1336	114.894	40.8112	Asia	-76.612	39.29	EastAm
Heilongjiang	Baltimore	-0.233468	-37.4046	126.658	45.7732	Asia	-76.612	39.29	EastAm
Iran1	Baltimore	-0.366585	-59.7603	52.2453	36.6225	MidEast	-76.612	39.29	EastAm
Iran2	Baltimore	-0.231788	-37.1225	52.9058	36.6442	MidEast	-76.612	39.29	EastAm
Iran4	Baltimore	-0.0930809	-13.8281	56.2667	27.1833	MidEast	-76.612	39.29	EastAm
Jiangxi	Baltimore	-0.0596635	-8.21597	115.894	28.6896	Asia	-76.612	39.29	EastAm
Liverpool	Baltimore	-0.00478881	0.999669	-2.94228	53.4704	WestEuro	-76.612	39.29	EastAm
Lovsta	Baltimore	-0.323539	-52.5312	17.8	59.8333	Scand	-76.612	39.29	EastAm
Malmo	Baltimore	-0.0680241	-9.62005	13.0358	55.6058	Scand	-76.612	39.29	EastAm
Marseille	Baltimore	-0.0629756	-8.7722	5.37	43.2964	WestEuro	-76.612	39.29	EastAm
Moggingen	Baltimore	-0.384605	-62.7866	10.6333	48.7833	WestEuro	-76.612	39.29	EastAm
Narati	Baltimore	-0.458058	-75.1221	84.0129	43.3232	Asia	-76.612	39.29	EastAm
Netherlands	Baltimore	-0.0150459	-0.722904	5.9387	51.6928	WestEuro	-76.612	39.29	EastAm
Nottingham	Baltimore	-0.019716	-1.50719	1.1333	52.95	WestEuro	-76.612	39.29	EastAm
NYC	Baltimore	0.0340523	7.52263	-73.9484	40.809	EastAm	-76.612	39.29	EastAm
Pursat	Baltimore	-0.099335	-14.8784	103.917	12.5333	SEAsia	-76.612	39.29	EastAm
Qinghai	Baltimore	-0.11502	-17.5126	101.768	36.6407	Asia	-76.612	39.29	EastAm
Russia2	Baltimore	-0.208153	-33.1532	134.94	47.73	Russia	-76.612	39.29	EastAm
Russia3	Baltimore	-0.296767	-48.0351	106	52	Russia	-76.612	39.29	EastAm
SakhalinskayaOblast	Baltimore	-0.1445	-22.4633	142.6	50.55	Asia	-76.612	39.29	EastAm
Salvador	Baltimore	-0.0135358	-0.469299	-38.501	-12.977	SouthAm	-76.612	39.29	EastAm
SanDiego	Baltimore	-0.241883	-38.8179	-117.161	32.715	WestAm	-76.612	39.29	EastAm
Sassenberg	Baltimore	-0.122186	-18.7159	8.0408	51.9897	WestEuro	-76.612	39.29	EastAm
Sihanouk	Baltimore	-0.222375	-35.5417	103.864	10.7153	SEAsia	-76.612	39.29	EastAm
Sonoma	Baltimore	-0.0769071	-11.1119	-122.45	38.29	EastAm	-76.612	39.29	EastAm
Stockholm	Baltimore	-0.0289698	-3.06128	18.0686	59.3294	Scand	-76.612	39.29	EastAm
Tarlac	Baltimore	-0.15368	-24.0051	120.465	15.4636	SEAsia	-76.612	39.29	EastAm
Turku	Baltimore	-0.0163486	-0.94168	22.2667	60.45	Scand	-76.612	39.29	EastAm
UdonThani	Baltimore	-0.102069	-15.3375	102.75	17.4167	SEAsia	-76.612	39.29	EastAm
Vancouver	Baltimore	-0.0408719	-5.06012	-123.12	49.282	EastAm	-76.612	39.29	EastAm
Yunnan1	Baltimore	-0.362874	-59.137	102.715	25.0492	Asia	-76.612	39.29	EastAm
Zhejiang	Baltimore	-0.336416	-54.6937	121.579	29.8853	Asia	-76.612	39.29	EastAm
Banpong	Bamako	0.0239091	5.81918	99.8711	13.8142	SEAsia	-8	12.65	Africa
Barcelona	Bamako	0.106378	19.669	2.173	41.385	WestEuro	-8	12.65	Africa
BayArea	Bamako	0.219646	38.6912	-122.27	37.87	WestAm	-8	12.65	Africa
Bergen	Bamako	0.00424723	2.51718	5.25959	60.2926	Scand	-8	12.65	Africa
BuenosAires	Bamako	0.184866	32.8502	-34.603	-58.381	SouthAm	-8	12.65	Africa
ElOliveto	Bamako	0.131992	23.9706	-71	-33	SouthAm	-8	12.65	Africa
Goteborg	Bamako	0.151432	27.2353	11.9667	57.7	Scand	-8	12.65	Africa
Guangdong1	Bamako	-0.0696096	-9.88632	110.365	21.2575	Asia	-8	12.65	Africa
HaidaGwaii	Bamako	-0.17538	-27.6493	-132	53	HG	-8	12.65	Africa
Hanoi	Bamako	0.0504054	10.269	105.854	21.0285	SEAsia	-8	12.65	Africa
Hebei	Bamako	-0.151546	-23.6467	114.894	40.8112	Asia	-8	12.65	Africa
Heilongjiang	Bamako	-0.0556993	-7.55022	126.658	45.7732	Asia	-8	12.65	Africa
Iran1	Bamako	-0.182914	-28.9146	52.2453	36.6225	MidEast	-8	12.65	Africa
Iran2	Bamako	-0.0363885	-4.30717	52.9058	36.6442	MidEast	-8	12.65	Africa
Iran4	Bamako	0.104429	19.3416	56.2667	27.1833	MidEast	-8	12.65	Africa
Jiangxi	Bamako	0.131994	23.9709	115.894	28.6896	Asia	-8	12.65	Africa
Liverpool	Bamako	0.192642	34.1561	-2.94228	53.4704	WestEuro	-8	12.65	Africa
Lovsta	Bamako	-0.138867	-21.5174	17.8	59.8333	Scand	-8	12.65	Africa
Malmo	Bamako	0.130467	23.7145	13.0358	55.6058	Scand	-8	12.65	Africa
Marseille	Bamako	0.136935	24.8007	5.37	43.2964	WestEuro	-8	12.65	Africa
Moggingen	Bamako	-0.203814	-32.4246	10.6333	48.7833	WestEuro	-8	12.65	Africa
Narati	Bamako	-0.288787	-46.6949	84.0129	43.3232	Asia	-8	12.65	Africa
Netherlands	Bamako	0.181122	32.2215	5.9387	51.6928	WestEuro	-8	12.65	Africa
Nottingham	Bamako	0.177741	31.6537	1.1333	52.95	WestEuro	-8	12.65	Africa
NYC	Bamako	0.228391	40.1598	-73.9484	40.809	EastAm	-8	12.65	Africa
Pursat	Bamako	0.0951506	17.7835	103.917	12.5333	SEAsia	-8	12.65	Africa
Qinghai	Bamako	0.0801042	15.2566	101.768	36.6407	Asia	-8	12.65	Africa
Russia2	Bamako	-0.0189592	-1.3801	134.94	47.73	Russia	-8	12.65	Africa
Russia3	Bamako	-0.131345	-20.2541	106	52	Russia	-8	12.65	Africa
SakhalinskayaOblast	Bamako	0.0506261	10.306	142.6	50.55	Asia	-8	12.65	Africa
Salvador	Bamako	0.183442	32.6112	-38.501	-12.977	SouthAm	-8	12.65	Africa
SanDiego	Bamako	-0.0480568	-6.26674	-117.161	32.715	WestAm	-8	12.65	Africa
Sassenberg	Bamako	0.0724709	13.9746	8.0408	51.9897	WestEuro	-8	12.65	Africa
Sihanouk	Bamako	-0.0319176	-3.55633	103.864	10.7153	SEAsia	-8	12.65	Africa
Sonoma	Bamako	0.121177	22.1543	-122.45	38.29	EastAm	-8	12.65	Africa
Stockholm	Bamako	0.168113	30.0368	18.0686	59.3294	Scand	-8	12.65	Africa
Tarlac	Bamako	0.0413449	8.74735	120.465	15.4636	SEAsia	-8	12.65	Africa
Turku	Bamako	0.180567	32.1282	22.2667	60.45	Scand	-8	12.65	Africa
UdonThani	Bamako	0.093064	17.433	102.75	17.4167	SEAsia	-8	12.65	Africa
Vancouver	Bamako	0.155273	27.8803	-123.12	49.282	EastAm	-8	12.65	Africa
Yunnan1	Bamako	-0.184945	-29.2557	102.715	25.0492	Asia	-8	12.65	Africa
Zhejiang	Bamako	-0.156374	-24.4574	121.579	29.8853	Asia	-8	12.65	Africa
Barcelona	Banpong	0.0808012	15.3736	2.173	41.385	WestEuro	99.8711	13.8142	SEAsia
BayArea	Banpong	0.193571	34.3122	-122.27	37.87	WestAm	99.8711	13.8142	SEAsia
Bergen	Banpong	-0.02132	-1.77657	5.25959	60.2926	Scand	99.8711	13.8142	SEAsia
BuenosAires	Banpong	0.159051	28.5148	-34.603	-58.381	SouthAm	99.8711	13.8142	SEAsia
ElOliveto	Banpong	0.0990263	18.4343	-71	-33	SouthAm	99.8711	13.8142	SEAsia
Goteborg	Banpong	0.126438	23.0379	11.9667	57.7	Scand	99.8711	13.8142	SEAsia
Guangdong1	Banpong	-0.0990148	-14.8246	110.365	21.2575	Asia	99.8711	13.8142	SEAsia
HaidaGwaii	Banpong	-0.201632	-32.0581	-132	53	HG	99.8711	13.8142	SEAsia
Hanoi	Banpong	0.0289562	6.66679	105.854	21.0285	SEAsia	99.8711	13.8142	SEAsia
Hebei	Banpong	-0.175407	-27.6539	114.894	40.8112	Asia	99.8711	13.8142	SEAsia
Heilongjiang	Banpong	-0.0775513	-11.22	126.658	45.7732	Asia	99.8711	13.8142	SEAsia
Iran1	Banpong	-0.212005	-33.8001	52.2453	36.6225	MidEast	99.8711	13.8142	SEAsia
Iran2	Banpong	-0.0611224	-8.46097	52.9058	36.6442	MidEast	99.8711	13.8142	SEAsia
Iran4	Banpong	0.0801779	15.2689	56.2667	27.1833	MidEast	99.8711	13.8142	SEAsia
Jiangxi	Banpong	0.111235	20.4846	115.894	28.6896	Asia	99.8711	13.8142	SEAsia
Liverpool	Banpong	0.166843	29.8234	-2.94228	53.4704	WestEuro	99.8711	13.8142	SEAsia
Lovsta	Banpong	-0.161319	-25.288	17.8	59.8333	Scand	99.8711	13.8142	SEAsia
Malmo	Banpong	0.101843	18.9074	13.0358	55.6058	Scand	99.8711	13.8142	SEAsia
Marseille	Banpong	0.107766	19.9021	5.37	43.2964	WestEuro	99.8711	13.8142	SEAsia
Moggingen	Banpong	-0.229532	-36.7436	10.6333	48.7833	WestEuro	99.8711	13.8142	SEAsia
Narati	Banpong	-0.3128	-50.7276	84.0129	43.3232	Asia	99.8711	13.8142	SEAsia
Netherlands	Banpong	0.154349	27.7252	5.9387	51.6928	WestEuro	99.8711	13.8142	SEAsia
Nottingham	Banpong	0.152547	27.4226	1.1333	52.95	WestEuro	99.8711	13.8142	SEAsia
NYC	Banpong	0.202701	35.8454	-73.9484	40.809	EastAm	99.8711	13.8142	SEAsia
Pursat	Banpong	0.0686607	13.3348	103.917	12.5333	SEAsia	99.8711	13.8142	SEAsia
Qinghai	Banpong	0.0519475	10.5279	101.768	36.6407	Asia	99.8711	13.8142	SEAsia
Russia2	Banpong	-0.0425914	-5.34888	134.94	47.73	Russia	99.8711	13.8142	SEAsia
Russia3	Banpong	-0.146027	-22.7199	106	52	Russia	99.8711	13.8142	SEAsia
SakhalinskayaOblast	Banpong	0.0286776	6.62001	142.6	50.55	Asia	99.8711	13.8142	SEAsia
Salvador	Banpong	0.158751	28.4645	-38.501	-12.977	SouthAm	99.8711	13.8142	SEAsia
SanDiego	Banpong	-0.0734554	-10.5322	-117.161	32.715	WestAm	99.8711	13.8142	SEAsia
Sassenberg	Banpong	0.0462847	9.57694	8.0408	51.9897	WestEuro	99.8711	13.8142	SEAsia
Sihanouk	Banpong	-0.0587685	-8.06566	103.864	10.7153	SEAsia	99.8711	13.8142	SEAsia
Sonoma	Banpong	0.0950401	17.7649	-122.45	38.29	EastAm	99.8711	13.8142	SEAsia
Stockholm	Banpong	0.141293	25.5326	18.0686	59.3294	Scand	99.8711	13.8142	SEAsia
Tarlac	Banpong	0.0194041	5.06262	120.465	15.4636	SEAsia	99.8711	13.8142	SEAsia
Turku	Banpong	0.154979	27.831	22.2667	60.45	Scand	99.8711	13.8142	SEAsia
UdonThani	Banpong	0.0729902	14.0618	102.75	17.4167	SEAsia	99.8711	13.8142	SEAsia
Vancouver	Banpong	0.131262	23.848	-123.12	49.282	EastAm	99.8711	13.8142	SEAsia
Yunnan1	Banpong	-0.20976	-33.423	102.715	25.0492	Asia	99.8711	13.8142	SEAsia
Zhejiang	Banpong	-0.178933	-28.246	121.579	29.8853	Asia	99.8711	13.8142	SEAsia
BayArea	Barcelona	0.116976	21.4488	-122.27	37.87	WestAm	2.173	41.385	WestEuro
Bergen	Barcelona	-0.100966	-15.1522	5.25959	60.2926	Scand	2.173	41.385	WestEuro
BuenosAires	Barcelona	0.0793791	15.1348	-34.603	-58.381	SouthAm	2.173	41.385	WestEuro
ElOliveto	Barcelona	0.0252486	6.04414	-71	-33	SouthAm	2.173	41.385	WestEuro
Goteborg	Barcelona	0.0441947	9.22594	11.9667	57.7	Scand	2.173	41.385	WestEuro
Guangdong1	Barcelona	-0.167433	-26.3147	110.365	21.2575	Asia	2.173	41.385	WestEuro
HaidaGwaii	Barcelona	-0.277137	-44.7384	-132	53	HG	2.173	41.385	WestEuro
Hanoi	Barcelona	-0.0531047	-7.11449	105.854	21.0285	SEAsia	2.173	41.385	WestEuro
Hebei	Barcelona	-0.242148	-38.8624	114.894	40.8112	Asia	2.173	41.385	WestEuro
Heilongjiang	Barcelona	-0.146652	-22.8247	126.658	45.7732	Asia	2.173	41.385	WestEuro
Iran1	Barcelona	-0.282544	-45.6465	52.2453	36.6225	MidEast	2.173	41.385	WestEuro
Iran2	Barcelona	-0.143898	-22.3623	52.9058	36.6442	MidEast	2.173	41.385	WestEuro
Iran4	Barcelona	-0.000661777	1.69276	56.2667	27.1833	MidEast	2.173	41.385	WestEuro
Jiangxi	Barcelona	0.0312782	7.05675	115.894	28.6896	Asia	2.173	41.385	WestEuro
Liverpool	Barcelona	0.0858688	16.2247	-2.94228	53.4704	WestEuro	2.173	41.385	WestEuro
Lovsta	Barcelona	-0.240512	-38.5877	17.8	59.8333	Scand	2.173	41.385	WestEuro
Malmo	Barcelona	0.0239374	5.82394	13.0358	55.6058	Scand	2.173	41.385	WestEuro
Marseille	Barcelona	0.0296314	6.78019	5.37	43.2964	WestEuro	2.173	41.385	WestEuro
Moggingen	Barcelona	-0.302467	-48.9923	10.6333	48.7833	WestEuro	2.173	41.385	WestEuro
Narati	Barcelona	-0.382809	-62.4849	84.0129	43.3232	Asia	2.173	41.385	WestEuro
Netherlands	Barcelona	0.0758825	14.5476	5.9387	51.6928	WestEuro	2.173	41.385	WestEuro
Nottingham	Barcelona	0.0729465	14.0545	1.1333	52.95	WestEuro	2.173	41.385	WestEuro
NYC	Barcelona	0.126052	22.9731	-73.9484	40.809	EastAm	2.173	41.385	WestEuro
Pursat	Barcelona	-0.00616488	0.768571	103.917	12.5333	SEAsia	2.173	41.385	WestEuro
Qinghai	Barcelona	-0.0238061	-2.19408	101.768	36.6407	Asia	2.173	41.385	WestEuro
Russia2	Barcelona	-0.119371	-18.2432	134.94	47.73	Russia	2.173	41.385	WestEuro
Russia3	Barcelona	-0.213833	-34.1071	106	52	Russia	2.173	41.385	WestEuro
SakhalinskayaOblast	Barcelona	-0.0507936	-6.72636	142.6	50.55	Asia	2.173	41.385	WestEuro
Salvador	Barcelona	0.0781333	14.9256	-38.501	-12.977	SouthAm	2.173	41.385	WestEuro
SanDiego	Barcelona	-0.15405	-24.0672	-117.161	32.715	WestAm	2.173	41.385	WestEuro
Sassenberg	Barcelona	-0.0312332	-3.44139	8.0408	51.9897	WestEuro	2.173	41.385	WestEuro
Sihanouk	Barcelona	-0.133813	-20.6687	103.864	10.7153	SEAsia	2.173	41.385	WestEuro
Sonoma	Barcelona	0.0166953	4.6077	-122.45	38.29	EastAm	2.173	41.385	WestEuro
Stockholm	Barcelona	0.0629364	12.3734	18.0686	59.3294	Scand	2.173	41.385	WestEuro
Tarlac	Barcelona	-0.0632908	-8.82514	120.465	15.4636	SEAsia	2.173	41.385	WestEuro
Turku	Barcelona	0.0756326	14.5056	22.2667	60.45	Scand	2.173	41.385	WestEuro
UdonThani	Barcelona	-0.0122687	-0.256494	102.75	17.4167	SEAsia	2.173	41.385	WestEuro
Vancouver	Barcelona	0.0507894	10.3335	-123.12	49.282	EastAm	2.173	41.385	WestEuro
Yunnan1	Barcelona	-0.281872	-45.5336	102.715	25.0492	Asia	2.173	41.385	WestEuro
Zhejiang	Barcelona	-0.253546	-40.7766	121.579	29.8853	Asia	2.173	41.385	WestEuro
Bergen	BayArea	-0.218775	-34.9372	5.25959	60.2926	Scand	-122.27	37.87	WestAm
BuenosAires	BayArea	-0.0382645	-4.62223	-34.603	-58.381	SouthAm	-122.27	37.87	WestAm
ElOliveto	BayArea	-0.0932848	-13.8623	-71	-33	SouthAm	-122.27	37.87	WestAm
Goteborg	BayArea	-0.0727713	-10.4173	11.9667	57.7	Scand	-122.27	37.87	WestAm
Guangdong1	BayArea	-0.278343	-44.941	110.365	21.2575	Asia	-122.27	37.87	WestAm
HaidaGwaii	BayArea	-0.381713	-62.3009	-132	53	HG	-122.27	37.87	WestAm
Hanoi	BayArea	-0.168327	-26.4649	105.854	21.0285	SEAsia	-122.27	37.87	WestAm
Hebei	BayArea	-0.350062	-56.9854	114.894	40.8112	Asia	-122.27	37.87	WestAm
Heilongjiang	BayArea	-0.261716	-42.1485	126.658	45.7732	Asia	-122.27	37.87	WestAm
Iran1	BayArea	-0.390552	-63.7852	52.2453	36.6225	MidEast	-122.27	37.87	WestAm
Iran2	BayArea	-0.254622	-40.9572	52.9058	36.6442	MidEast	-122.27	37.87	WestAm
Iran4	BayArea	-0.116497	-17.7606	56.2667	27.1833	MidEast	-122.27	37.87	WestAm
Jiangxi	BayArea	-0.084233	-12.3422	115.894	28.6896	Asia	-122.27	37.87	WestAm
Liverpool	BayArea	-0.0309263	-3.38986	-2.94228	53.4704	WestEuro	-122.27	37.87	WestAm
Lovsta	BayArea	-0.347908	-56.6236	17.8	59.8333	Scand	-122.27	37.87	WestAm
Malmo	BayArea	-0.0935755	-13.9111	13.0358	55.6058	Scand	-122.27	37.87	WestAm
Marseille	BayArea	-0.0880907	-12.99	5.37	43.2964	WestEuro	-122.27	37.87	WestAm
Moggingen	BayArea	-0.405299	-66.2619	10.6333	48.7833	WestEuro	-122.27	37.87	WestAm
Narati	BayArea	-0.476716	-78.2557	84.0129	43.3232	Asia	-122.27	37.87	WestAm
Netherlands	BayArea	-0.040775	-5.04384	5.9387	51.6928	WestEuro	-122.27	37.87	WestAm
Nottingham	BayArea	-0.044204	-5.61971	1.1333	52.95	WestEuro	-122.27	37.87	WestAm
NYC	BayArea	0.00808035	3.16091	-73.9484	40.809	EastAm	-122.27	37.87	WestAm
Pursat	BayArea	-0.121907	-18.6691	103.917	12.5333	SEAsia	-122.27	37.87	WestAm
Qinghai	BayArea	-0.138656	-21.482	101.768	36.6407	Asia	-122.27	37.87	WestAm
Russia2	BayArea	-0.231439	-37.0638	134.94	47.73	Russia	-122.27	37.87	WestAm
Russia3	BayArea	-0.323988	-52.6065	106	52	Russia	-122.27	37.87	WestAm
SakhalinskayaOblast	BayArea	-0.16581	-26.0422	142.6	50.55	Asia	-122.27	37.87	WestAm
Salvador	BayArea	-0.0392925	-4.79487	-38.501	-12.977	SouthAm	-122.27	37.87	WestAm
SanDiego	BayArea	-0.262861	-42.3408	-117.161	32.715	WestAm	-122.27	37.87	WestAm
Sassenberg	BayArea	-0.149451	-23.2948	8.0408	51.9897	WestEuro	-122.27	37.87	WestAm
Sihanouk	BayArea	-0.245413	-39.4107	103.864	10.7153	SEAsia	-122.27	37.87	WestAm
Sonoma	BayArea	-0.102975	-15.4897	-122.45	38.29	EastAm	-122.27	37.87	WestAm
Stockholm	BayArea	-0.0551719	-7.46165	18.0686	59.3294	Scand	-122.27	37.87	WestAm
Tarlac	BayArea	-0.178728	-28.2116	120.465	15.4636	SEAsia	-122.27	37.87	WestAm
Turku	BayArea	-0.0416523	-5.19117	22.2667	60.45	Scand	-122.27	37.87	WestAm
UdonThani	BayArea	-0.126055	-19.3657	102.75	17.4167	SEAsia	-122.27	37.87	WestAm
Vancouver	BayArea	-0.0664381	-9.35369	-123.12	49.282	EastAm	-122.27	37.87	WestAm
Yunnan1	BayArea	-0.385617	-62.9566	102.715	25.0492	Asia	-122.27	37.87	WestAm
Zhejiang	BayArea	-0.357027	-58.1551	121.579	29.8853	Asia	-122.27	37.87	WestAm
BuenosAires	Bergen	0.181677	32.3147	-34.603	-58.381	SouthAm	5.25959	60.2926	Scand
ElOliveto	Bergen	0.128054	23.3093	-71	-33	SouthAm	5.25959	60.2926	Scand
Goteborg	Bergen	0.146968	26.4857	11.9667	57.7	Scand	5.25959	60.2926	Scand
Guangdong1	Bergen	-0.0639286	-8.93225	110.365	21.2575	Asia	5.25959	60.2926	Scand
HaidaGwaii	Bergen	-0.178226	-28.1274	-132	53	HG	5.25959	60.2926	Scand
Hanoi	Bergen	0.0516357	10.4756	105.854	21.0285	SEAsia	5.25959	60.2926	Scand
Hebei	Bergen	-0.13982	-21.6775	114.894	40.8112	Asia	5.25959	60.2926	Scand
Heilongjiang	Bergen	-0.0430165	-5.42027	126.658	45.7732	Asia	5.25959	60.2926	Scand
Iran1	Bergen	-0.18796	-29.762	52.2453	36.6225	MidEast	5.25959	60.2926	Scand
Iran2	Bergen	-0.0413657	-5.14304	52.9058	36.6442	MidEast	5.25959	60.2926	Scand
Iran4	Bergen	0.104496	19.353	56.2667	27.1833	MidEast	5.25959	60.2926	Scand
Jiangxi	Bergen	0.135201	24.5096	115.894	28.6896	Asia	5.25959	60.2926	Scand
Liverpool	Bergen	0.190235	33.7519	-2.94228	53.4704	WestEuro	5.25959	60.2926	Scand
Lovsta	Bergen	-0.139791	-21.6726	17.8	59.8333	Scand	5.25959	60.2926	Scand
Malmo	Bergen	0.127613	23.2351	13.0358	55.6058	Scand	5.25959	60.2926	Scand
Marseille	Bergen	0.132237	24.0117	5.37	43.2964	WestEuro	5.25959	60.2926	Scand
Moggingen	Bergen	-0.204505	-32.5405	10.6333	48.7833	WestEuro	5.25959	60.2926	Scand
Narati	Bergen	-0.291725	-47.1883	84.0129	43.3232	Asia	5.25959	60.2926	Scand
Netherlands	Bergen	0.17813	31.719	5.9387	51.6928	WestEuro	5.25959	60.2926	Scand
Nottingham	Bergen	0.177109	31.5476	1.1333	52.95	WestEuro	5.25959	60.2926	Scand
NYC	Bergen	0.226144	39.7824	-73.9484	40.809	EastAm	5.25959	60.2926	Scand
Pursat	Bergen	0.0981921	18.2942	103.917	12.5333	SEAsia	5.25959	60.2926	Scand
Qinghai	Bergen	0.0809274	15.3948	101.768	36.6407	Asia	5.25959	60.2926	Scand
Russia2	Bergen	-0.0143253	-0.601888	134.94	47.73	Russia	5.25959	60.2926	Scand
Russia3	Bergen	-0.113186	-17.2045	106	52	Russia	5.25959	60.2926	Scand
SakhalinskayaOblast	Bergen	0.0520234	10.5407	142.6	50.55	Asia	5.25959	60.2926	Scand
Salvador	Bergen	0.181842	32.3425	-38.501	-12.977	SouthAm	5.25959	60.2926	Scand
SanDiego	Bergen	-0.0507163	-6.71338	-117.161	32.715	WestAm	5.25959	60.2926	Scand
Sassenberg	Bergen	0.0691181	13.4116	8.0408	51.9897	WestEuro	5.25959	60.2926	Scand
Sihanouk	Bergen	-0.0279296	-2.88658	103.864	10.7153	SEAsia	5.25959	60.2926	Scand
Sonoma	Bergen	0.119318	21.8421	-122.45	38.29	EastAm	5.25959	60.2926	Scand
Stockholm	Bergen	0.165935	29.6709	18.0686	59.3294	Scand	5.25959	60.2926	Scand
Tarlac	Bergen	0.0412158	8.72567	120.465	15.4636	SEAsia	5.25959	60.2926	Scand
Turku	Bergen	0.178839	31.838	22.2667	60.45	Scand	5.25959	60.2926	Scand
UdonThani	Bergen	0.0943907	17.6558	102.75	17.4167	SEAsia	5.25959	60.2926	Scand
Vancouver	Bergen	0.154587	27.7652	-123.12	49.282	EastAm	5.25959	60.2926	Scand
Yunnan1	Bergen	-0.185478	-29.3452	102.715	25.0492	Asia	5.25959	60.2926	Scand
Zhejiang	Bergen	-0.153704	-24.0092	121.579	29.8853	Asia	5.25959	60.2926	Scand
ElOliveto	BuenosAires	-0.053324	-7.15132	-71	-33	SouthAm	-34.603	-58.381	SouthAm
Goteborg	BuenosAires	-0.0348295	-4.04535	11.9667	57.7	Scand	-34.603	-58.381	SouthAm
Guangdong1	BuenosAires	-0.242436	-38.9107	110.365	21.2575	Asia	-34.603	-58.381	SouthAm
HaidaGwaii	BuenosAires	-0.348777	-56.7696	-132	53	HG	-34.603	-58.381	SouthAm
Hanoi	BuenosAires	-0.130347	-20.0865	105.854	21.0285	SEAsia	-34.603	-58.381	SouthAm
Hebei	BuenosAires	-0.31505	-51.1055	114.894	40.8112	Asia	-34.603	-58.381	SouthAm
Heilongjiang	BuenosAires	-0.220597	-35.2431	126.658	45.7732	Asia	-34.603	-58.381	SouthAm
Iran1	BuenosAires	-0.352989	-57.4769	52.2453	36.6225	MidEast	-34.603	-58.381	SouthAm
Iran2	BuenosAires	-0.217409	-34.7077	52.9058	36.6442	MidEast	-34.603	-58.381	SouthAm
Iran4	BuenosAires	-0.0798451	-11.6053	56.2667	27.1833	MidEast	-34.603	-58.381	SouthAm
Jiangxi	BuenosAires	-0.0455239	-5.84137	115.894	28.6896	Asia	-34.603	-58.381	SouthAm
Liverpool	BuenosAires	0.00793352	3.13625	-2.94228	53.4704	WestEuro	-34.603	-58.381	SouthAm
Lovsta	BuenosAires	-0.313894	-50.9114	17.8	59.8333	Scand	-34.603	-58.381	SouthAm
Malmo	BuenosAires	-0.0555574	-7.52639	13.0358	55.6058	Scand	-34.603	-58.381	SouthAm
Marseille	BuenosAires	-0.0498738	-6.57188	5.37	43.2964	WestEuro	-34.603	-58.381	SouthAm
Moggingen	BuenosAires	-0.370925	-60.4891	10.6333	48.7833	WestEuro	-34.603	-58.381	SouthAm
Narati	BuenosAires	-0.443911	-72.7463	84.0129	43.3232	Asia	-34.603	-58.381	SouthAm
Netherlands	BuenosAires	-0.00217236	1.43907	5.9387	51.6928	WestEuro	-34.603	-58.381	SouthAm
Nottingham	BuenosAires	-0.00669156	0.680121	1.1333	52.95	WestEuro	-34.603	-58.381	SouthAm
NYC	BuenosAires	0.0463877	9.59423	-73.9484	40.809	EastAm	-34.603	-58.381	SouthAm
Pursat	BuenosAires	-0.0861799	-12.6691	103.917	12.5333	SEAsia	-34.603	-58.381	SouthAm
Qinghai	BuenosAires	-0.10001	-14.9917	101.768	36.6407	Asia	-34.603	-58.381	SouthAm
Russia2	BuenosAires	-0.193905	-30.7604	134.94	47.73	Russia	-34.603	-58.381	SouthAm
Russia3	BuenosAires	-0.28719	-46.4267	106	52	Russia	-34.603	-58.381	SouthAm
SakhalinskayaOblast	BuenosAires	-0.129313	-19.9128	142.6	50.55	Asia	-34.603	-58.381	SouthAm
Salvador	BuenosAires	-0.000861608	1.6592	-38.501	-12.977	SouthAm	-34.603	-58.381	SouthAm
SanDiego	BuenosAires	-0.229209	-36.6894	-117.161	32.715	WestAm	-34.603	-58.381	SouthAm
Sassenberg	BuenosAires	-0.110053	-16.6784	8.0408	51.9897	WestEuro	-34.603	-58.381	SouthAm
Sihanouk	BuenosAires	-0.209221	-33.3326	103.864	10.7153	SEAsia	-34.603	-58.381	SouthAm
Sonoma	BuenosAires	-0.0630254	-8.78056	-122.45	38.29	EastAm	-34.603	-58.381	SouthAm
Stockholm	BuenosAires	-0.0166093	-0.985468	18.0686	59.3294	Scand	-34.603	-58.381	SouthAm
Tarlac	BuenosAires	-0.14013	-21.7296	120.465	15.4636	SEAsia	-34.603	-58.381	SouthAm
Turku	BuenosAires	-0.00381174	1.16376	22.2667	60.45	Scand	-34.603	-58.381	SouthAm
UdonThani	BuenosAires	-0.0888592	-13.1191	102.75	17.4167	SEAsia	-34.603	-58.381	SouthAm
Vancouver	BuenosAires	-0.027646	-2.83896	-123.12	49.282	EastAm	-34.603	-58.381	SouthAm
Yunnan1	BuenosAires	-0.351744	-57.2678	102.715	25.0492	Asia	-34.603	-58.381	SouthAm
Zhejiang	BuenosAires	-0.325342	-52.8339	121.579	29.8853	Asia	-34.603	-58.381	SouthAm
Goteborg	ElOliveto	0.0207224	5.284	11.9667	57.7	Scand	-71	-33	SouthAm
Guangdong1	ElOliveto	-0.191079	-30.2859	110.365	21.2575	Asia	-71	-33	SouthAm
HaidaGwaii	ElOliveto	-0.300983	-48.7431	-132	53	HG	-71	-33	SouthAm
Hanoi	ElOliveto	-0.0756091	-10.8939	105.854	21.0285	SEAsia	-71	-33	SouthAm
Hebei	ElOliveto	-0.263455	-42.4406	114.894	40.8112	Asia	-71	-33	SouthAm
Heilongjiang	ElOliveto	-0.168956	-26.5705	126.658	45.7732	Asia	-71	-33	SouthAm
Iran1	ElOliveto	-0.311949	-50.5848	52.2453	36.6225	MidEast	-71	-33	SouthAm
Iran2	ElOliveto	-0.16744	-26.3159	52.9058	36.6442	MidEast	-71	-33	SouthAm
Iran4	ElOliveto	-0.0250844	-2.40876	56.2667	27.1833	MidEast	-71	-33	SouthAm
Jiangxi	ElOliveto	0.0108135	3.61991	115.894	28.6896	Asia	-71	-33	SouthAm
Liverpool	ElOliveto	0.0625157	12.3028	-2.94228	53.4704	WestEuro	-71	-33	SouthAm
Lovsta	ElOliveto	-0.264035	-42.5381	17.8	59.8333	Scand	-71	-33	SouthAm
Malmo	ElOliveto	-7.89e-05	1.79065	13.0358	55.6058	Scand	-71	-33	SouthAm
Marseille	ElOliveto	0.00565731	2.75399	5.37	43.2964	WestEuro	-71	-33	SouthAm
Moggingen	ElOliveto	-0.322549	-52.3649	10.6333	48.7833	WestEuro	-71	-33	SouthAm
Narati	ElOliveto	-0.399718	-65.3245	84.0129	43.3232	Asia	-71	-33	SouthAm
Netherlands	ElOliveto	0.0528661	10.6822	5.9387	51.6928	WestEuro	-71	-33	SouthAm
Nottingham	ElOliveto	0.0503874	10.2659	1.1333	52.95	WestEuro	-71	-33	SouthAm
NYC	ElOliveto	0.101553	18.8588	-73.9484	40.809	EastAm	-71	-33	SouthAm
Pursat	ElOliveto	-0.0280283	-2.90317	103.917	12.5333	SEAsia	-71	-33	SouthAm
Qinghai	ElOliveto	-0.0454649	-5.83146	101.768	36.6407	Asia	-71	-33	SouthAm
Russia2	ElOliveto	-0.140796	-21.8414	134.94	47.73	Russia	-71	-33	SouthAm
Russia3	ElOliveto	-0.234882	-37.6422	106	52	Russia	-71	-33	SouthAm
SakhalinskayaOblast	ElOliveto	-0.0714264	-10.1914	142.6	50.55	Asia	-71	-33	SouthAm
Salvador	ElOliveto	0.055146	11.0651	-38.501	-12.977	SouthAm	-71	-33	SouthAm
SanDiego	ElOliveto	-0.175182	-27.616	-117.161	32.715	WestAm	-71	-33	SouthAm
Sassenberg	ElOliveto	-0.0565727	-7.6969	8.0408	51.9897	WestEuro	-71	-33	SouthAm
Sihanouk	ElOliveto	-0.152686	-23.8381	103.864	10.7153	SEAsia	-71	-33	SouthAm
Sonoma	ElOliveto	-0.0081335	0.437963	-122.45	38.29	EastAm	-71	-33	SouthAm
Stockholm	ElOliveto	0.0363439	7.90748	18.0686	59.3294	Scand	-71	-33	SouthAm
Tarlac	ElOliveto	-0.0860576	-12.6486	120.465	15.4636	SEAsia	-71	-33	SouthAm
Turku	ElOliveto	0.0514444	10.4435	22.2667	60.45	Scand	-71	-33	SouthAm
UdonThani	ElOliveto	-0.0306954	-3.35107	102.75	17.4167	SEAsia	-71	-33	SouthAm
Vancouver	ElOliveto	0.0277564	6.4653	-123.12	49.282	EastAm	-71	-33	SouthAm
Yunnan1	ElOliveto	-0.303458	-49.1587	102.715	25.0492	Asia	-71	-33	SouthAm
Zhejiang	ElOliveto	-0.273958	-44.2046	121.579	29.8853	Asia	-71	-33	SouthAm
Guangdong1	Goteborg	-0.210356	-33.5232	110.365	21.2575	Asia	11.9667	57.7	Scand
HaidaGwaii	Goteborg	-0.320287	-51.9849	-132	53	HG	11.9667	57.7	Scand
Hanoi	Goteborg	-0.0986661	-14.766	105.854	21.0285	SEAsia	11.9667	57.7	Scand
Hebei	Goteborg	-0.284287	-45.9391	114.894	40.8112	Asia	11.9667	57.7	Scand
Heilongjiang	Goteborg	-0.188732	-29.8918	126.658	45.7732	Asia	11.9667	57.7	Scand
Iran1	Goteborg	-0.325211	-52.8119	52.2453	36.6225	MidEast	11.9667	57.7	Scand
Iran2	Goteborg	-0.186981	-29.5976	52.9058	36.6442	MidEast	11.9667	57.7	Scand
Iran4	Goteborg	-0.0459612	-5.91481	56.2667	27.1833	MidEast	11.9667	57.7	Scand
Jiangxi	Goteborg	-0.0122736	-0.257319	115.894	28.6896	Asia	11.9667	57.7	Scand
Liverpool	Goteborg	0.0425963	8.9575	-2.94228	53.4704	WestEuro	11.9667	57.7	Scand
Lovsta	Goteborg	-0.281555	-45.4803	17.8	59.8333	Scand	11.9667	57.7	Scand
Malmo	Goteborg	-0.0207974	-1.68882	13.0358	55.6058	Scand	11.9667	57.7	Scand
Marseille	Goteborg	-0.0146208	-0.651514	5.37	43.2964	WestEuro	11.9667	57.7	Scand
Moggingen	Goteborg	-0.341119	-55.4835	10.6333	48.7833	WestEuro	11.9667	57.7	Scand
Narati	Goteborg	-0.419022	-68.5664	84.0129	43.3232	Asia	11.9667	57.7	Scand
Netherlands	Goteborg	0.0328021	7.31267	5.9387	51.6928	WestEuro	11.9667	57.7	Scand
Nottingham	Goteborg	0.0278841	6.48674	1.1333	52.95	WestEuro	11.9667	57.7	Scand
NYC	Goteborg	0.0805877	15.3378	-73.9484	40.809	EastAm	11.9667	57.7	Scand
Pursat	Goteborg	-0.0524396	-7.00279	103.917	12.5333	SEAsia	11.9667	57.7	Scand
Qinghai	Goteborg	-0.0702045	-9.98621	101.768	36.6407	Asia	11.9667	57.7	Scand
Russia2	Goteborg	-0.162515	-25.4889	134.94	47.73	Russia	11.9667	57.7	Scand
Russia3	Goteborg	-0.255985	-41.1862	106	52	Russia	11.9667	57.7	Scand
SakhalinskayaOblast	Goteborg	-0.0971142	-14.5054	142.6	50.55	Asia	11.9667	57.7	Scand
Salvador	Goteborg	0.0349482	7.67309	-38.501	-12.977	SouthAm	11.9667	57.7	Scand
SanDiego	Goteborg	-0.198703	-31.5661	-117.161	32.715	WestAm	11.9667	57.7	Scand
Sassenberg	Goteborg	-0.0763942	-11.0257	8.0408	51.9897	WestEuro	11.9667	57.7	Scand
Sihanouk	Goteborg	-0.177584	-28.0194	103.864	10.7153	SEAsia	11.9667	57.7	Scand
Sonoma	Goteborg	-0.0294555	-3.14284	-122.45	38.29	EastAm	11.9667	57.7	Scand
Stockholm	Goteborg	0.0195703	5.09053	18.0686	59.3294	Scand	11.9667	57.7	Scand
Tarlac	Goteborg	-0.108434	-16.4065	120.465	15.4636	SEAsia	11.9667	57.7	Scand
Turku	Goteborg	0.0318146	7.14683	22.2667	60.45	Scand	11.9667	57.7	Scand
UdonThani	Goteborg	-0.0553803	-7.49665	102.75	17.4167	SEAsia	11.9667	57.7	Scand
Vancouver	Goteborg	0.00645179	2.88741	-123.12	49.282	EastAm	11.9667	57.7	Scand
Yunnan1	Goteborg	-0.322555	-52.3658	102.715	25.0492	Asia	11.9667	57.7	Scand
Zhejiang	Goteborg	-0.292702	-47.3523	121.579	29.8853	Asia	11.9667	57.7	Scand
HaidaGwaii	Guangdong1	-0.116671	-17.7898	-132	53	HG	110.365	21.2575	Asia
Hanoi	Guangdong1	0.125226	22.8343	105.854	21.0285	SEAsia	110.365	21.2575	Asia
Hebei	Guangdong1	-0.0821532	-11.9929	114.894	40.8112	Asia	110.365	21.2575	Asia
Heilongjiang	Guangdong1	0.0160674	4.50226	126.658	45.7732	Asia	110.365	21.2575	Asia
Iran1	Guangdong1	-0.125905	-19.3405	52.2453	36.6225	MidEast	110.365	21.2575	Asia
Iran2	Guangdong1	0.0251856	6.03357	52.9058	36.6442	MidEast	110.365	21.2575	Asia
Iran4	Guangdong1	0.170472	30.4329	56.2667	27.1833	MidEast	110.365	21.2575	Asia
Jiangxi	Guangdong1	0.209331	36.9589	115.894	28.6896	Asia	110.365	21.2575	Asia
Liverpool	Guangdong1	0.248555	43.5462	-2.94228	53.4704	WestEuro	110.365	21.2575	Asia
Lovsta	Guangdong1	-0.0781852	-11.3265	17.8	59.8333	Scand	110.365	21.2575	Asia
Malmo	Guangdong1	0.189266	33.5891	13.0358	55.6058	Scand	110.365	21.2575	Asia
Marseille	Guangdong1	0.194531	34.4734	5.37	43.2964	WestEuro	110.365	21.2575	Asia
Moggingen	Guangdong1	-0.143168	-22.2398	10.6333	48.7833	WestEuro	110.365	21.2575	Asia
Narati	Guangdong1	-0.223777	-35.7771	84.0129	43.3232	Asia	110.365	21.2575	Asia
Netherlands	Guangdong1	0.237449	41.681	5.9387	51.6928	WestEuro	110.365	21.2575	Asia
Nottingham	Guangdong1	0.234838	41.2425	1.1333	52.95	WestEuro	110.365	21.2575	Asia
NYC	Guangdong1	0.284094	49.5145	-73.9484	40.809	EastAm	110.365	21.2575	Asia
Pursat	Guangdong1	0.170144	30.3778	103.917	12.5333	SEAsia	110.365	21.2575	Asia
Qinghai	Guangdong1	0.153916	27.6525	101.768	36.6407	Asia	110.365	21.2575	Asia
Russia2	Guangdong1	0.0582403	11.5848	134.94	47.73	Russia	110.365	21.2575	Asia
Russia3	Guangdong1	-0.0642635	-8.98849	106	52	Russia	110.365	21.2575	Asia
SakhalinskayaOblast	Guangdong1	0.121205	22.159	142.6	50.55	Asia	110.365	21.2575	Asia
Salvador	Guangdong1	0.240594	42.2092	-38.501	-12.977	SouthAm	110.365	21.2575	Asia
SanDiego	Guangdong1	0.0146627	4.26635	-117.161	32.715	WestAm	110.365	21.2575	Asia
Sassenberg	Guangdong1	0.133087	24.1545	8.0408	51.9897	WestEuro	110.365	21.2575	Asia
Sihanouk	Guangdong1	0.0421945	8.89003	103.864	10.7153	SEAsia	110.365	21.2575	Asia
Sonoma	Guangdong1	0.179648	31.9738	-122.45	38.29	EastAm	110.365	21.2575	Asia
Stockholm	Guangdong1	0.227089	39.9412	18.0686	59.3294	Scand	110.365	21.2575	Asia
Tarlac	Guangdong1	0.115445	21.1917	120.465	15.4636	SEAsia	110.365	21.2575	Asia
Turku	Guangdong1	0.236873	41.5842	22.2667	60.45	Scand	110.365	21.2575	Asia
UdonThani	Guangdong1	0.16829	30.0664	102.75	17.4167	SEAsia	110.365	21.2575	Asia
Vancouver	Guangdong1	0.214376	37.8061	-123.12	49.282	EastAm	110.365	21.2575	Asia
Yunnan1	Guangdong1	-0.111161	-16.8645	102.715	25.0492	Asia	110.365	21.2575	Asia
Zhejiang	Guangdong1	-0.0782134	-11.3312	121.579	29.8853	Asia	110.365	21.2575	Asia
Hanoi	HaidaGwaii	0.22752	40.0135	105.854	21.0285	SEAsia	-132	53	HG
Hebei	HaidaGwaii	0.0377477	8.14323	114.894	40.8112	Asia	-132	53	HG
Heilongjiang	HaidaGwaii	0.138095	24.9956	126.658	45.7732	Asia	-132	53	HG
Iran1	HaidaGwaii	-0.00620597	0.761672	52.2453	36.6225	MidEast	-132	53	HG
Iran2	HaidaGwaii	0.147867	26.6366	52.9058	36.6442	MidEast	-132	53	HG
Iran4	HaidaGwaii	0.278182	48.5217	56.2667	27.1833	MidEast	-132	53	HG
Jiangxi	HaidaGwaii	0.305532	53.1148	115.894	28.6896	Asia	-132	53	HG
Liverpool	HaidaGwaii	0.35773	61.881	-2.94228	53.4704	WestEuro	-132	53	HG
Lovsta	HaidaGwaii	0.0400336	8.52712	17.8	59.8333	Scand	-132	53	HG
Malmo	HaidaGwaii	0.301759	52.4811	13.0358	55.6058	Scand	-132	53	HG
Marseille	HaidaGwaii	0.304193	52.8899	5.37	43.2964	WestEuro	-132	53	HG
Moggingen	HaidaGwaii	-0.0219049	-1.8748	10.6333	48.7833	WestEuro	-132	53	HG
Narati	HaidaGwaii	-0.112523	-17.0931	84.0129	43.3232	Asia	-132	53	HG
Netherlands	HaidaGwaii	0.349084	60.429	5.9387	51.6928	WestEuro	-132	53	HG
Nottingham	HaidaGwaii	0.343773	59.537	1.1333	52.95	WestEuro	-132	53	HG
NYC	HaidaGwaii	0.390695	67.417	-73.9484	40.809	EastAm	-132	53	HG
Pursat	HaidaGwaii	0.270992	47.3141	103.917	12.5333	SEAsia	-132	53	HG
Qinghai	HaidaGwaii	0.254529	44.5494	101.768	36.6407	Asia	-132	53	HG
Russia2	HaidaGwaii	0.16623	29.7205	134.94	47.73	Russia	-132	53	HG
Russia3	HaidaGwaii	0.0713176	13.781	106	52	Russia	-132	53	HG
SakhalinskayaOblast	HaidaGwaii	0.228276	40.1405	142.6	50.55	Asia	-132	53	HG
Salvador	HaidaGwaii	0.349857	60.5588	-38.501	-12.977	SouthAm	-132	53	HG
SanDiego	HaidaGwaii	0.130268	23.6811	-117.161	32.715	WestAm	-132	53	HG
Sassenberg	HaidaGwaii	0.243994	42.7802	8.0408	51.9897	WestEuro	-132	53	HG
Sihanouk	HaidaGwaii	0.150366	27.0563	103.864	10.7153	SEAsia	-132	53	HG
Sonoma	HaidaGwaii	0.293185	51.0413	-122.45	38.29	EastAm	-132	53	HG
Stockholm	HaidaGwaii	0.338281	58.6147	18.0686	59.3294	Scand	-132	53	HG
Tarlac	HaidaGwaii	0.218815	38.5517	120.465	15.4636	SEAsia	-132	53	HG
Turku	HaidaGwaii	0.348984	60.4121	22.2667	60.45	Scand	-132	53	HG
UdonThani	HaidaGwaii	0.269619	47.0836	102.75	17.4167	SEAsia	-132	53	HG
Vancouver	HaidaGwaii	0.324266	56.2611	-123.12	49.282	EastAm	-132	53	HG
Yunnan1	HaidaGwaii	-0.00292618	1.31248	102.715	25.0492	Asia	-132	53	HG
Zhejiang	HaidaGwaii	0.02491	5.98727	121.579	29.8853	Asia	-132	53	HG
Hebei	Hanoi	-0.19795	-31.4397	114.894	40.8112	Asia	105.854	21.0285	SEAsia
Heilongjiang	Hanoi	-0.103741	-15.6183	126.658	45.7732	Asia	105.854	21.0285	SEAsia
Iran1	Hanoi	-0.235443	-37.7364	52.2453	36.6225	MidEast	105.854	21.0285	SEAsia
Iran2	Hanoi	-0.0900871	-13.3253	52.9058	36.6442	MidEast	105.854	21.0285	SEAsia
Iran4	Hanoi	0.0546793	10.9867	56.2667	27.1833	MidEast	105.854	21.0285	SEAsia
Jiangxi	Hanoi	0.0849945	16.0778	115.894	28.6896	Asia	105.854	21.0285	SEAsia
Liverpool	Hanoi	0.137352	24.8707	-2.94228	53.4704	WestEuro	105.854	21.0285	SEAsia
Lovsta	Hanoi	-0.188014	-29.7712	17.8	59.8333	Scand	105.854	21.0285	SEAsia
Malmo	Hanoi	0.0769604	14.7286	13.0358	55.6058	Scand	105.854	21.0285	SEAsia
Marseille	Hanoi	0.081012	15.409	5.37	43.2964	WestEuro	105.854	21.0285	SEAsia
Moggingen	Hanoi	-0.254587	-40.9513	10.6333	48.7833	WestEuro	105.854	21.0285	SEAsia
Narati	Hanoi	-0.333301	-54.1705	84.0129	43.3232	Asia	105.854	21.0285	SEAsia
Netherlands	Hanoi	0.127196	23.1652	5.9387	51.6928	WestEuro	105.854	21.0285	SEAsia
Nottingham	Hanoi	0.125849	22.9389	1.1333	52.95	WestEuro	105.854	21.0285	SEAsia
NYC	Hanoi	0.176352	31.4204	-73.9484	40.809	EastAm	105.854	21.0285	SEAsia
Pursat	Hanoi	0.042068	8.86878	103.917	12.5333	SEAsia	105.854	21.0285	SEAsia
Qinghai	Hanoi	0.0280635	6.51688	101.768	36.6407	Asia	105.854	21.0285	SEAsia
Russia2	Hanoi	-0.0657797	-9.24311	134.94	47.73	Russia	105.854	21.0285	SEAsia
Russia3	Hanoi	-0.171171	-26.9424	106	52	Russia	105.854	21.0285	SEAsia
SakhalinskayaOblast	Hanoi	0.000319479	1.85755	142.6	50.55	Asia	105.854	21.0285	SEAsia
Salvador	Hanoi	0.13074	23.7604	-38.501	-12.977	SouthAm	105.854	21.0285	SEAsia
SanDiego	Hanoi	-0.101145	-15.1823	-117.161	32.715	WestAm	105.854	21.0285	SEAsia
Sassenberg	Hanoi	0.0180613	4.8371	8.0408	51.9897	WestEuro	105.854	21.0285	SEAsia
Sihanouk	Hanoi	-0.0861642	-12.6665	103.864	10.7153	SEAsia	105.854	21.0285	SEAsia
Sonoma	Hanoi	0.0663064	12.9394	-122.45	38.29	EastAm	105.854	21.0285	SEAsia
Stockholm	Hanoi	0.113613	20.8841	18.0686	59.3294	Scand	105.854	21.0285	SEAsia
Tarlac	Hanoi	-0.00897284	0.297004	120.465	15.4636	SEAsia	105.854	21.0285	SEAsia
Turku	Hanoi	0.126773	23.0942	22.2667	60.45	Scand	105.854	21.0285	SEAsia
UdonThani	Hanoi	0.0449328	9.34989	102.75	17.4167	SEAsia	105.854	21.0285	SEAsia
Vancouver	Hanoi	0.103264	19.1461	-123.12	49.282	EastAm	105.854	21.0285	SEAsia
Yunnan1	Hanoi	-0.234322	-37.548	102.715	25.0492	Asia	105.854	21.0285	SEAsia
Zhejiang	Hanoi	-0.202669	-32.2322	121.579	29.8853	Asia	105.854	21.0285	SEAsia
Heilongjiang	Hebei	0.0931806	17.4526	126.658	45.7732	Asia	114.894	40.8112	Asia
Iran1	Hebei	-0.0489995	-6.42505	52.2453	36.6225	MidEast	114.894	40.8112	Asia
Iran2	Hebei	0.102242	18.9743	52.9058	36.6442	MidEast	114.894	40.8112	Asia
Iran4	Hebei	0.245728	43.0713	56.2667	27.1833	MidEast	114.894	40.8112	Asia
Jiangxi	Hebei	0.289455	50.4149	115.894	28.6896	Asia	114.894	40.8112	Asia
Liverpool	Hebei	0.3217	55.8301	-2.94228	53.4704	WestEuro	114.894	40.8112	Asia
Lovsta	Hebei	-0.00154937	1.5437	17.8	59.8333	Scand	114.894	40.8112	Asia
Malmo	Hebei	0.261953	45.7962	13.0358	55.6058	Scand	114.894	40.8112	Asia
Marseille	Hebei	0.268771	46.9411	5.37	43.2964	WestEuro	114.894	40.8112	Asia
Moggingen	Hebei	-0.0662546	-9.32287	10.6333	48.7833	WestEuro	114.894	40.8112	Asia
Narati	Hebei	-0.119989	-18.3469	84.0129	43.3232	Asia	114.894	40.8112	Asia
Netherlands	Hebei	0.311334	54.0892	5.9387	51.6928	WestEuro	114.894	40.8112	Asia
Nottingham	Hebei	0.308633	53.6355	1.1333	52.95	WestEuro	114.894	40.8112	Asia
NYC	Hebei	0.355375	61.4855	-73.9484	40.809	EastAm	114.894	40.8112	Asia
Pursat	Hebei	0.241484	42.3586	103.917	12.5333	SEAsia	114.894	40.8112	Asia
Qinghai	Hebei	0.250405	43.8568	101.768	36.6407	Asia	114.894	40.8112	Asia
Russia2	Hebei	0.15486	27.811	134.94	47.73	Russia	114.894	40.8112	Asia
Russia3	Hebei	0.0117028	3.76926	106	52	Russia	114.894	40.8112	Asia
SakhalinskayaOblast	Hebei	0.211835	37.3794	142.6	50.55	Asia	114.894	40.8112	Asia
Salvador	Hebei	0.313763	54.4972	-38.501	-12.977	SouthAm	114.894	40.8112	Asia
SanDiego	Hebei	0.098373	18.3246	-117.161	32.715	WestAm	114.894	40.8112	Asia
Sassenberg	Hebei	0.209644	37.0114	8.0408	51.9897	WestEuro	114.894	40.8112	Asia
Sihanouk	Hebei	0.117663	21.5642	103.864	10.7153	SEAsia	114.894	40.8112	Asia
Sonoma	Hebei	0.254453	44.5366	-122.45	38.29	EastAm	114.894	40.8112	Asia
Stockholm	Hebei	0.297773	51.8118	18.0686	59.3294	Scand	114.894	40.8112	Asia
Tarlac	Hebei	0.190666	33.8243	120.465	15.4636	SEAsia	114.894	40.8112	Asia
Turku	Hebei	0.310811	54.0014	22.2667	60.45	Scand	114.894	40.8112	Asia
UdonThani	Hebei	0.242637	42.5522	102.75	17.4167	SEAsia	114.894	40.8112	Asia
Vancouver	Hebei	0.288859	50.3147	-123.12	49.282	EastAm	114.894	40.8112	Asia
Yunnan1	Hebei	-0.0267493	-2.68836	102.715	25.0492	Asia	114.894	40.8112	Asia
Zhejiang	Hebei	0.00199585	2.13908	121.579	29.8853	Asia	114.894	40.8112	Asia
Iran1	Heilongjiang	-0.144422	-22.4503	52.2453	36.6225	MidEast	126.658	45.7732	Asia
Iran2	Heilongjiang	0.00274846	2.26548	52.9058	36.6442	MidEast	126.658	45.7732	Asia
Iran4	Heilongjiang	0.150721	27.1159	56.2667	27.1833	MidEast	126.658	45.7732	Asia
Jiangxi	Heilongjiang	0.197336	34.9444	115.894	28.6896	Asia	126.658	45.7732	Asia
Liverpool	Heilongjiang	0.227791	40.0591	-2.94228	53.4704	WestEuro	126.658	45.7732	Asia
Lovsta	Heilongjiang	-0.101527	-15.2465	17.8	59.8333	Scand	126.658	45.7732	Asia
Malmo	Heilongjiang	0.166783	29.8133	13.0358	55.6058	Scand	126.658	45.7732	Asia
Marseille	Heilongjiang	0.174628	31.1308	5.37	43.2964	WestEuro	126.658	45.7732	Asia
Moggingen	Heilongjiang	-0.164678	-25.8521	10.6333	48.7833	WestEuro	126.658	45.7732	Asia
Narati	Heilongjiang	-0.220334	-35.1989	84.0129	43.3232	Asia	126.658	45.7732	Asia
Netherlands	Heilongjiang	0.217322	38.3009	5.9387	51.6928	WestEuro	126.658	45.7732	Asia
Nottingham	Heilongjiang	0.214582	37.8407	1.1333	52.95	WestEuro	126.658	45.7732	Asia
NYC	Heilongjiang	0.264823	46.2781	-73.9484	40.809	EastAm	126.658	45.7732	Asia
Pursat	Heilongjiang	0.149317	26.8802	103.917	12.5333	SEAsia	126.658	45.7732	Asia
Qinghai	Heilongjiang	0.155636	27.9414	101.768	36.6407	Asia	126.658	45.7732	Asia
Russia2	Heilongjiang	0.0799813	15.2359	134.94	47.73	Russia	126.658	45.7732	Asia
Russia3	Heilongjiang	-0.0887638	-13.1031	106	52	Russia	126.658	45.7732	Asia
SakhalinskayaOblast	Heilongjiang	0.120646	22.0652	142.6	50.55	Asia	126.658	45.7732	Asia
Salvador	Heilongjiang	0.220933	38.9074	-38.501	-12.977	SouthAm	126.658	45.7732	Asia
SanDiego	Heilongjiang	0.00420172	2.50953	-117.161	32.715	WestAm	126.658	45.7732	Asia
Sassenberg	Heilongjiang	0.111321	20.4991	8.0408	51.9897	WestEuro	126.658	45.7732	Asia
Sihanouk	Heilongjiang	0.0206622	5.27391	103.864	10.7153	SEAsia	126.658	45.7732	Asia
Sonoma	Heilongjiang	0.159282	28.5537	-122.45	38.29	EastAm	126.658	45.7732	Asia
Stockholm	Heilongjiang	0.203842	36.037	18.0686	59.3294	Scand	126.658	45.7732	Asia
Tarlac	Heilongjiang	0.0939282	17.5782	120.465	15.4636	SEAsia	126.658	45.7732	Asia
Turku	Heilongjiang	0.216638	38.186	22.2667	60.45	Scand	126.658	45.7732	Asia
UdonThani	Heilongjiang	0.14776	26.6186	102.75	17.4167	SEAsia	126.658	45.7732	Asia
Vancouver	Heilongjiang	0.19427	34.4295	-123.12	49.282	EastAm	126.658	45.7732	Asia
Yunnan1	Heilongjiang	-0.126301	-19.4071	102.715	25.0492	Asia	126.658	45.7732	Asia
Zhejiang	Heilongjiang	-0.0948941	-14.1326	121.579	29.8853	Asia	126.658	45.7732	Asia
Iran2	Iran1	0.144421	26.0579	52.9058	36.6442	MidEast	52.2453	36.6225	MidEast
Iran4	Iran1	0.285427	49.7385	56.2667	27.1833	MidEast	52.2453	36.6225	MidEast
Jiangxi	Iran1	0.316049	54.881	115.894	28.6896	Asia	52.2453	36.6225	MidEast
Liverpool	Iran1	0.364332	62.9897	-2.94228	53.4704	WestEuro	52.2453	36.6225	MidEast
Lovsta	Iran1	0.0460174	9.53204	17.8	59.8333	Scand	52.2453	36.6225	MidEast
Malmo	Iran1	0.304112	52.8764	13.0358	55.6058	Scand	52.2453	36.6225	MidEast
Marseille	Iran1	0.310512	53.9513	5.37	43.2964	WestEuro	52.2453	36.6225	MidEast
Moggingen	Iran1	-0.0230603	-2.06883	10.6333	48.7833	WestEuro	52.2453	36.6225	MidEast
Narati	Iran1	-0.110648	-16.7784	84.0129	43.3232	Asia	52.2453	36.6225	MidEast
Netherlands	Iran1	0.352445	60.9933	5.9387	51.6928	WestEuro	52.2453	36.6225	MidEast
Nottingham	Iran1	0.349731	60.5376	1.1333	52.95	WestEuro	52.2453	36.6225	MidEast
NYC	Iran1	0.39456	68.0662	-73.9484	40.809	EastAm	52.2453	36.6225	MidEast
Pursat	Iran1	0.282565	49.2577	103.917	12.5333	SEAsia	52.2453	36.6225	MidEast
Qinghai	Iran1	0.267041	46.6507	101.768	36.6407	Asia	52.2453	36.6225	MidEast
Russia2	Iran1	0.175641	31.3009	134.94	47.73	Russia	52.2453	36.6225	MidEast
Russia3	Iran1	0.0798723	15.2176	106	52	Russia	52.2453	36.6225	MidEast
SakhalinskayaOblast	Iran1	0.239241	41.982	142.6	50.55	Asia	52.2453	36.6225	MidEast
Salvador	Iran1	0.357653	61.8679	-38.501	-12.977	SouthAm	52.2453	36.6225	MidEast
SanDiego	Iran1	0.137495	24.8948	-117.161	32.715	WestAm	52.2453	36.6225	MidEast
Sassenberg	Iran1	0.25248	44.2053	8.0408	51.9897	WestEuro	52.2453	36.6225	MidEast
Sihanouk	Iran1	0.157289	28.219	103.864	10.7153	SEAsia	52.2453	36.6225	MidEast
Sonoma	Iran1	0.299053	52.0268	-122.45	38.29	EastAm	52.2453	36.6225	MidEast
Stockholm	Iran1	0.338775	58.6977	18.0686	59.3294	Scand	52.2453	36.6225	MidEast
Tarlac	Iran1	0.227058	39.936	120.465	15.4636	SEAsia	52.2453	36.6225	MidEast
Turku	Iran1	0.354044	61.2618	22.2667	60.45	Scand	52.2453	36.6225	MidEast
UdonThani	Iran1	0.27519	48.0192	102.75	17.4167	SEAsia	52.2453	36.6225	MidEast
Vancouver	Iran1	0.331523	57.4798	-123.12	49.282	EastAm	52.2453	36.6225	MidEast
Yunnan1	Iran1	0.0118085	3.78701	102.715	25.0492	Asia	52.2453	36.6225	MidEast
Zhejiang	Iran1	0.0418966	8.84001	121.579	29.8853	Asia	52.2453	36.6225	MidEast
Iran4	Iran2	0.144851	26.1301	56.2667	27.1833	MidEast	52.9058	36.6442	MidEast
Jiangxi	Iran2	0.176221	31.3984	115.894	28.6896	Asia	52.9058	36.6442	MidEast
Liverpool	Iran2	0.227969	40.0889	-2.94228	53.4704	WestEuro	52.9058	36.6442	MidEast
Lovsta	Iran2	-0.101837	-15.2986	17.8	59.8333	Scand	52.9058	36.6442	MidEast
Malmo	Iran2	0.165327	29.5688	13.0358	55.6058	Scand	52.9058	36.6442	MidEast
Marseille	Iran2	0.172544	30.7808	5.37	43.2964	WestEuro	52.9058	36.6442	MidEast
Moggingen	Iran2	-0.170177	-26.7756	10.6333	48.7833	WestEuro	52.9058	36.6442	MidEast
Narati	Iran2	-0.254182	-40.8834	84.0129	43.3232	Asia	52.9058	36.6442	MidEast
Netherlands	Iran2	0.218349	38.4734	5.9387	51.6928	WestEuro	52.9058	36.6442	MidEast
Nottingham	Iran2	0.213304	37.6261	1.1333	52.95	WestEuro	52.9058	36.6442	MidEast
NYC	Iran2	0.262709	45.9232	-73.9484	40.809	EastAm	52.9058	36.6442	MidEast
Pursat	Iran2	0.138497	25.063	103.917	12.5333	SEAsia	52.9058	36.6442	MidEast
Qinghai	Iran2	0.122545	22.384	101.768	36.6407	Asia	52.9058	36.6442	MidEast
Russia2	Iran2	0.0266951	6.28707	134.94	47.73	Russia	52.9058	36.6442	MidEast
Russia3	Iran2	-0.0744805	-10.7043	106	52	Russia	52.9058	36.6442	MidEast
SakhalinskayaOblast	Iran2	0.090445	16.9932	142.6	50.55	Asia	52.9058	36.6442	MidEast
Salvador	Iran2	0.219494	38.6657	-38.501	-12.977	SouthAm	52.9058	36.6442	MidEast
SanDiego	Iran2	-0.015201	-0.748945	-117.161	32.715	WestAm	52.9058	36.6442	MidEast
Sassenberg	Iran2	0.109537	20.1995	8.0408	51.9897	WestEuro	52.9058	36.6442	MidEast
Sihanouk	Iran2	0.0111506	3.67652	103.864	10.7153	SEAsia	52.9058	36.6442	MidEast
Sonoma	Iran2	0.155654	27.9444	-122.45	38.29	EastAm	52.9058	36.6442	MidEast
Stockholm	Iran2	0.204049	36.0718	18.0686	59.3294	Scand	52.9058	36.6442	MidEast
Tarlac	Iran2	0.0816935	15.5235	120.465	15.4636	SEAsia	52.9058	36.6442	MidEast
Turku	Iran2	0.216496	38.1621	22.2667	60.45	Scand	52.9058	36.6442	MidEast
UdonThani	Iran2	0.132816	24.109	102.75	17.4167	SEAsia	52.9058	36.6442	MidEast
Vancouver	Iran2	0.190844	33.8542	-123.12	49.282	EastAm	52.9058	36.6442	MidEast
Yunnan1	Iran2	-0.143578	-22.3085	102.715	25.0492	Asia	52.9058	36.6442	MidEast
Zhejiang	Iran2	-0.105233	-15.8688	121.579	29.8853	Asia	52.9058	36.6442	MidEast
Jiangxi	Iran4	0.0320556	7.1873	115.894	28.6896	Asia	56.2667	27.1833	MidEast
Liverpool	Iran4	0.088437	16.656	-2.94228	53.4704	WestEuro	56.2667	27.1833	MidEast
Lovsta	Iran4	-0.240624	-38.6063	17.8	59.8333	Scand	56.2667	27.1833	MidEast
Malmo	Iran4	0.0244723	5.91376	13.0358	55.6058	Scand	56.2667	27.1833	MidEast
Marseille	Iran4	0.028815	6.64309	5.37	43.2964	WestEuro	56.2667	27.1833	MidEast
Moggingen	Iran4	-0.304817	-49.3869	10.6333	48.7833	WestEuro	56.2667	27.1833	MidEast
Narati	Iran4	-0.380118	-62.033	84.0129	43.3232	Asia	56.2667	27.1833	MidEast
Netherlands	Iran4	0.076284	14.615	5.9387	51.6928	WestEuro	56.2667	27.1833	MidEast
Nottingham	Iran4	0.07345	14.1391	1.1333	52.95	WestEuro	56.2667	27.1833	MidEast
NYC	Iran4	0.12617	22.9928	-73.9484	40.809	EastAm	56.2667	27.1833	MidEast
Pursat	Iran4	-0.0063925	0.730346	103.917	12.5333	SEAsia	56.2667	27.1833	MidEast
Qinghai	Iran4	-0.0235818	-2.15643	101.768	36.6407	Asia	56.2667	27.1833	MidEast
Russia2	Iran4	-0.117567	-17.9403	134.94	47.73	Russia	56.2667	27.1833	MidEast
Russia3	Iran4	-0.218551	-34.8995	106	52	Russia	56.2667	27.1833	MidEast
SakhalinskayaOblast	Iran4	-0.0528499	-7.07169	142.6	50.55	Asia	56.2667	27.1833	MidEast
Salvador	Iran4	0.079874	15.2179	-38.501	-12.977	SouthAm	56.2667	27.1833	MidEast
SanDiego	Iran4	-0.153181	-23.9213	-117.161	32.715	WestAm	56.2667	27.1833	MidEast
Sassenberg	Iran4	-0.0324253	-3.6416	8.0408	51.9897	WestEuro	56.2667	27.1833	MidEast
Sihanouk	Iran4	-0.133155	-20.5581	103.864	10.7153	SEAsia	56.2667	27.1833	MidEast
Sonoma	Iran4	0.0158388	4.46386	-122.45	38.29	EastAm	56.2667	27.1833	MidEast
Stockholm	Iran4	0.0621003	12.233	18.0686	59.3294	Scand	56.2667	27.1833	MidEast
Tarlac	Iran4	-0.0624838	-8.68961	120.465	15.4636	SEAsia	56.2667	27.1833	MidEast
Turku	Iran4	0.0758077	14.535	22.2667	60.45	Scand	56.2667	27.1833	MidEast
UdonThani	Iran4	-0.00820456	0.426029	102.75	17.4167	SEAsia	56.2667	27.1833	MidEast
Vancouver	Iran4	0.0516352	10.4755	-123.12	49.282	EastAm	56.2667	27.1833	MidEast
Yunnan1	Iran4	-0.281336	-45.4435	102.715	25.0492	Asia	56.2667	27.1833	MidEast
Zhejiang	Iran4	-0.253653	-40.7945	121.579	29.8853	Asia	56.2667	27.1833	MidEast
Liverpool	Jiangxi	0.0538448	10.8466	-2.94228	53.4704	WestEuro	115.894	28.6896	Asia
Lovsta	Jiangxi	-0.273076	-44.0565	17.8	59.8333	Scand	115.894	28.6896	Asia
Malmo	Jiangxi	-0.0103849	0.0598691	13.0358	55.6058	Scand	115.894	28.6896	Asia
Marseille	Jiangxi	-0.00316514	1.27235	5.37	43.2964	WestEuro	115.894	28.6896	Asia
Moggingen	Jiangxi	-0.334545	-54.3794	10.6333	48.7833	WestEuro	115.894	28.6896	Asia
Narati	Jiangxi	-0.407777	-66.6779	84.0129	43.3232	Asia	115.894	28.6896	Asia
Netherlands	Jiangxi	0.0412202	8.72641	5.9387	51.6928	WestEuro	115.894	28.6896	Asia
Nottingham	Jiangxi	0.0403336	8.5775	1.1333	52.95	WestEuro	115.894	28.6896	Asia
NYC	Jiangxi	0.0922197	17.2912	-73.9484	40.809	EastAm	115.894	28.6896	Asia
Pursat	Jiangxi	-0.0390108	-4.74755	103.917	12.5333	SEAsia	115.894	28.6896	Asia
Qinghai	Jiangxi	-0.0501462	-6.61763	101.768	36.6407	Asia	115.894	28.6896	Asia
Russia2	Jiangxi	-0.152768	-23.8519	134.94	47.73	Russia	115.894	28.6896	Asia
Russia3	Jiangxi	-0.265243	-42.7409	106	52	Russia	115.894	28.6896	Asia
SakhalinskayaOblast	Jiangxi	-0.0792989	-11.5135	142.6	50.55	Asia	115.894	28.6896	Asia
Salvador	Jiangxi	0.0455014	9.44539	-38.501	-12.977	SouthAm	115.894	28.6896	Asia
SanDiego	Jiangxi	-0.183878	-29.0765	-117.161	32.715	WestAm	115.894	28.6896	Asia
Sassenberg	Jiangxi	-0.0672715	-9.49365	8.0408	51.9897	WestEuro	115.894	28.6896	Asia
Sihanouk	Jiangxi	-0.167053	-26.251	103.864	10.7153	SEAsia	115.894	28.6896	Asia
Sonoma	Jiangxi	-0.0182038	-1.25324	-122.45	38.29	EastAm	115.894	28.6896	Asia
Stockholm	Jiangxi	0.027868	6.48404	18.0686	59.3294	Scand	115.894	28.6896	Asia
Tarlac	Jiangxi	-0.0933123	-13.8669	120.465	15.4636	SEAsia	115.894	28.6896	Asia
Turku	Jiangxi	0.0413187	8.74295	22.2667	60.45	Scand	115.894	28.6896	Asia
UdonThani	Jiangxi	-0.0393378	-4.80247	102.75	17.4167	SEAsia	115.894	28.6896	Asia
Vancouver	Jiangxi	0.0179986	4.82658	-123.12	49.282	EastAm	115.894	28.6896	Asia
Yunnan1	Jiangxi	-0.313823	-50.8995	102.715	25.0492	Asia	115.894	28.6896	Asia
Zhejiang	Jiangxi	-0.28266	-45.6659	121.579	29.8853	Asia	115.894	28.6896	Asia
Lovsta	Liverpool	-0.319811	-51.905	17.8	59.8333	Scand	-2.94228	53.4704	WestEuro
Malmo	Liverpool	-0.0637475	-8.90183	13.0358	55.6058	Scand	-2.94228	53.4704	WestEuro
Marseille	Liverpool	-0.0579293	-7.92473	5.37	43.2964	WestEuro	-2.94228	53.4704	WestEuro
Moggingen	Liverpool	-0.378565	-61.7722	10.6333	48.7833	WestEuro	-2.94228	53.4704	WestEuro
Narati	Liverpool	-0.453288	-74.3211	84.0129	43.3232	Asia	-2.94228	53.4704	WestEuro
Netherlands	Liverpool	-0.00955487	0.199258	5.9387	51.6928	WestEuro	-2.94228	53.4704	WestEuro
Nottingham	Liverpool	-0.014598	-0.647688	1.1333	52.95	WestEuro	-2.94228	53.4704	WestEuro
NYC	Liverpool	0.0388177	8.32292	-73.9484	40.809	EastAm	-2.94228	53.4704	WestEuro
Pursat	Liverpool	-0.0920865	-13.6611	103.917	12.5333	SEAsia	-2.94228	53.4704	WestEuro
Qinghai	Liverpool	-0.109699	-16.6189	101.768	36.6407	Asia	-2.94228	53.4704	WestEuro
Russia2	Liverpool	-0.201302	-32.0027	134.94	47.73	Russia	-2.94228	53.4704	WestEuro
Russia3	Liverpool	-0.291849	-47.2091	106	52	Russia	-2.94228	53.4704	WestEuro
SakhalinskayaOblast	Liverpool	-0.138208	-21.4067	142.6	50.55	Asia	-2.94228	53.4704	WestEuro
Salvador	Liverpool	-0.00837955	0.396641	-38.501	-12.977	SouthAm	-2.94228	53.4704	WestEuro
SanDiego	Liverpool	-0.237029	-38.0026	-117.161	32.715	WestAm	-2.94228	53.4704	WestEuro
Sassenberg	Liverpool	-0.117992	-18.0117	8.0408	51.9897	WestEuro	-2.94228	53.4704	WestEuro
Sihanouk	Liverpool	-0.215635	-34.4098	103.864	10.7153	SEAsia	-2.94228	53.4704	WestEuro
Sonoma	Liverpool	-0.0713111	-10.1721	-122.45	38.29	EastAm	-2.94228	53.4704	WestEuro
Stockholm	Liverpool	-0.0237995	-2.19298	18.0686	59.3294	Scand	-2.94228	53.4704	WestEuro
Tarlac	Liverpool	-0.149145	-23.2435	120.465	15.4636	SEAsia	-2.94228	53.4704	WestEuro
Turku	Liverpool	-0.010872	-0.0219404	22.2667	60.45	Scand	-2.94228	53.4704	WestEuro
UdonThani	Liverpool	-0.0974377	-14.5597	102.75	17.4167	SEAsia	-2.94228	53.4704	WestEuro
Vancouver	Liverpool	-0.0365483	-4.33401	-123.12	49.282	EastAm	-2.94228	53.4704	WestEuro
Yunnan1	Liverpool	-0.358815	-58.4554	102.715	25.0492	Asia	-2.94228	53.4704	WestEuro
Zhejiang	Liverpool	-0.330577	-53.713	121.579	29.8853	Asia	-2.94228	53.4704	WestEuro
Malmo	Lovsta	0.261936	45.7933	13.0358	55.6058	Scand	17.8	59.8333	Scand
Marseille	Lovsta	0.267958	46.8046	5.37	43.2964	WestEuro	17.8	59.8333	Scand
Moggingen	Lovsta	-0.0649006	-9.09548	10.6333	48.7833	WestEuro	17.8	59.8333	Scand
Narati	Lovsta	-0.154118	-24.0786	84.0129	43.3232	Asia	17.8	59.8333	Scand
Netherlands	Lovsta	0.31129	54.0819	5.9387	51.6928	WestEuro	17.8	59.8333	Scand
Nottingham	Lovsta	0.30515	53.0507	1.1333	52.95	WestEuro	17.8	59.8333	Scand
NYC	Lovsta	0.354068	61.266	-73.9484	40.809	EastAm	17.8	59.8333	Scand
Pursat	Lovsta	0.236866	41.5831	103.917	12.5333	SEAsia	17.8	59.8333	Scand
Qinghai	Lovsta	0.222472	39.1658	101.768	36.6407	Asia	17.8	59.8333	Scand
Russia2	Lovsta	0.12979	23.6008	134.94	47.73	Russia	17.8	59.8333	Scand
Russia3	Lovsta	0.0312978	7.06003	106	52	Russia	17.8	59.8333	Scand
SakhalinskayaOblast	Lovsta	0.191652	33.9899	142.6	50.55	Asia	17.8	59.8333	Scand
Salvador	Lovsta	0.309291	53.7461	-38.501	-12.977	SouthAm	17.8	59.8333	Scand
SanDiego	Lovsta	0.0904836	16.9997	-117.161	32.715	WestAm	17.8	59.8333	Scand
Sassenberg	Lovsta	0.214928	37.8989	8.0408	51.9897	WestEuro	17.8	59.8333	Scand
Sihanouk	Lovsta	0.110464	20.3552	103.864	10.7153	SEAsia	17.8	59.8333	Scand
Sonoma	Lovsta	0.256284	44.8442	-122.45	38.29	EastAm	17.8	59.8333	Scand
Stockholm	Lovsta	0.30183	52.4931	18.0686	59.3294	Scand	17.8	59.8333	Scand
Tarlac	Lovsta	0.182494	32.4518	120.465	15.4636	SEAsia	17.8	59.8333	Scand
Turku	Lovsta	0.312854	54.3445	22.2667	60.45	Scand	17.8	59.8333	Scand
UdonThani	Lovsta	0.230791	40.5629	102.75	17.4167	SEAsia	17.8	59.8333	Scand
Vancouver	Lovsta	0.286448	49.9098	-123.12	49.282	EastAm	17.8	59.8333	Scand
Yunnan1	Lovsta	-0.04221	-5.28483	102.715	25.0492	Asia	17.8	59.8333	Scand
Zhejiang	Lovsta	-0.0116798	-0.157593	121.579	29.8853	Asia	17.8	59.8333	Scand
Marseille	Malmo	0.0050366	2.64974	5.37	43.2964	WestEuro	13.0358	55.6058	Scand
Moggingen	Malmo	-0.322407	-52.341	10.6333	48.7833	WestEuro	13.0358	55.6058	Scand
Narati	Malmo	-0.402372	-65.7703	84.0129	43.3232	Asia	13.0358	55.6058	Scand
Netherlands	Malmo	0.0528828	10.685	5.9387	51.6928	WestEuro	13.0358	55.6058	Scand
Nottingham	Malmo	0.0487796	9.99592	1.1333	52.95	WestEuro	13.0358	55.6058	Scand
NYC	Malmo	0.101203	18.7998	-73.9484	40.809	EastAm	13.0358	55.6058	Scand
Pursat	Malmo	-0.0285536	-2.99138	103.917	12.5333	SEAsia	13.0358	55.6058	Scand
Qinghai	Malmo	-0.0440729	-5.59768	101.768	36.6407	Asia	13.0358	55.6058	Scand
Russia2	Malmo	-0.138916	-21.5257	134.94	47.73	Russia	13.0358	55.6058	Scand
Russia3	Malmo	-0.234553	-37.5869	106	52	Russia	13.0358	55.6058	Scand
SakhalinskayaOblast	Malmo	-0.0730261	-10.4601	142.6	50.55	Asia	13.0358	55.6058	Scand
Salvador	Malmo	0.0541245	10.8935	-38.501	-12.977	SouthAm	13.0358	55.6058	Scand
SanDiego	Malmo	-0.175304	-27.6365	-117.161	32.715	WestAm	13.0358	55.6058	Scand
Sassenberg	Malmo	-0.0563905	-7.6663	8.0408	51.9897	WestEuro	13.0358	55.6058	Scand
Sihanouk	Malmo	-0.153399	-23.9578	103.864	10.7153	SEAsia	13.0358	55.6058	Scand
Sonoma	Malmo	-0.00829539	0.410776	-122.45	38.29	EastAm	13.0358	55.6058	Scand
Stockholm	Malmo	0.0407389	8.64558	18.0686	59.3294	Scand	13.0358	55.6058	Scand
Tarlac	Malmo	-0.0865681	-12.7343	120.465	15.4636	SEAsia	13.0358	55.6058	Scand
Turku	Malmo	0.0537787	10.8355	22.2667	60.45	Scand	13.0358	55.6058	Scand
UdonThani	Malmo	-0.0336398	-3.84555	102.75	17.4167	SEAsia	13.0358	55.6058	Scand
Vancouver	Malmo	0.0265406	6.26112	-123.12	49.282	EastAm	13.0358	55.6058	Scand
Yunnan1	Malmo	-0.300196	-48.611	102.715	25.0492	Asia	13.0358	55.6058	Scand
Zhejiang	Malmo	-0.270009	-43.5413	121.579	29.8853	Asia	13.0358	55.6058	Scand
Moggingen	Marseille	-0.326214	-52.9804	10.6333	48.7833	WestEuro	5.37	43.2964	WestEuro
Narati	Marseille	-0.404301	-66.0942	84.0129	43.3232	Asia	5.37	43.2964	WestEuro
Netherlands	Marseille	0.0485316	9.95427	5.9387	51.6928	WestEuro	5.37	43.2964	WestEuro
Nottingham	Marseille	0.0438782	9.17279	1.1333	52.95	WestEuro	5.37	43.2964	WestEuro
NYC	Marseille	0.0970743	18.1065	-73.9484	40.809	EastAm	5.37	43.2964	WestEuro
Pursat	Marseille	-0.037032	-4.41524	103.917	12.5333	SEAsia	5.37	43.2964	WestEuro
Qinghai	Marseille	-0.0527793	-7.05983	101.768	36.6407	Asia	5.37	43.2964	WestEuro
Russia2	Marseille	-0.1455	-22.6313	134.94	47.73	Russia	5.37	43.2964	WestEuro
Russia3	Marseille	-0.239407	-38.4021	106	52	Russia	5.37	43.2964	WestEuro
SakhalinskayaOblast	Marseille	-0.0815782	-11.8963	142.6	50.55	Asia	5.37	43.2964	WestEuro
Salvador	Marseille	0.0489895	10.0312	-38.501	-12.977	SouthAm	5.37	43.2964	WestEuro
SanDiego	Marseille	-0.182187	-28.7925	-117.161	32.715	WestAm	5.37	43.2964	WestEuro
Sassenberg	Marseille	-0.0636509	-8.8856	8.0408	51.9897	WestEuro	5.37	43.2964	WestEuro
Sihanouk	Marseille	-0.162059	-25.4123	103.864	10.7153	SEAsia	5.37	43.2964	WestEuro
Sonoma	Marseille	-0.0133093	-0.431251	-122.45	38.29	EastAm	5.37	43.2964	WestEuro
Stockholm	Marseille	0.0335422	7.43696	18.0686	59.3294	Scand	5.37	43.2964	WestEuro
Tarlac	Marseille	-0.0932139	-13.8504	120.465	15.4636	SEAsia	5.37	43.2964	WestEuro
Turku	Marseille	0.0474455	9.77187	22.2667	60.45	Scand	5.37	43.2964	WestEuro
UdonThani	Marseille	-0.0405697	-5.00937	102.75	17.4167	SEAsia	5.37	43.2964	WestEuro
Vancouver	Marseille	0.0221489	5.52358	-123.12	49.282	EastAm	5.37	43.2964	WestEuro
Yunnan1	Marseille	-0.309758	-50.2168	102.715	25.0492	Asia	5.37	43.2964	WestEuro
Zhejiang	Marseille	-0.280715	-45.3393	121.579	29.8853	Asia	5.37	43.2964	WestEuro
Narati	Moggingen	-0.0954412	-14.2245	84.0129	43.3232	Asia	10.6333	48.7833	WestEuro
Netherlands	Moggingen	0.368126	63.6268	5.9387	51.6928	WestEuro	10.6333	48.7833	WestEuro
Nottingham	Moggingen	0.366976	63.4337	1.1333	52.95	WestEuro	10.6333	48.7833	WestEuro
NYC	Moggingen	0.410086	70.6735	-73.9484	40.809	EastAm	10.6333	48.7833	WestEuro
Pursat	Moggingen	0.299731	52.1406	103.917	12.5333	SEAsia	10.6333	48.7833	WestEuro
Qinghai	Moggingen	0.285409	49.7354	101.768	36.6407	Asia	10.6333	48.7833	WestEuro
Russia2	Moggingen	0.197306	34.9394	134.94	47.73	Russia	10.6333	48.7833	WestEuro
Russia3	Moggingen	0.0974065	18.1623	106	52	Russia	10.6333	48.7833	WestEuro
SakhalinskayaOblast	Moggingen	0.257194	44.9969	142.6	50.55	Asia	10.6333	48.7833	WestEuro
Salvador	Moggingen	0.371671	64.2223	-38.501	-12.977	SouthAm	10.6333	48.7833	WestEuro
SanDiego	Moggingen	0.156658	28.113	-117.161	32.715	WestAm	10.6333	48.7833	WestEuro
Sassenberg	Moggingen	0.270726	47.2696	8.0408	51.9897	WestEuro	10.6333	48.7833	WestEuro
Sihanouk	Moggingen	0.178659	31.8078	103.864	10.7153	SEAsia	10.6333	48.7833	WestEuro
Sonoma	Moggingen	0.318392	55.2746	-122.45	38.29	EastAm	10.6333	48.7833	WestEuro
Stockholm	Moggingen	0.356759	61.7179	18.0686	59.3294	Scand	10.6333	48.7833	WestEuro
Tarlac	Moggingen	0.246044	43.1245	120.465	15.4636	SEAsia	10.6333	48.7833	WestEuro
Turku	Moggingen	0.368052	63.6144	22.2667	60.45	Scand	10.6333	48.7833	WestEuro
UdonThani	Moggingen	0.294101	51.195	102.75	17.4167	SEAsia	10.6333	48.7833	WestEuro
Vancouver	Moggingen	0.345305	59.7942	-123.12	49.282	EastAm	10.6333	48.7833	WestEuro
Yunnan1	Moggingen	0.0276085	6.44046	102.715	25.0492	Asia	10.6333	48.7833	WestEuro
Zhejiang	Moggingen	0.0555951	11.1405	121.579	29.8853	Asia	10.6333	48.7833	WestEuro
Netherlands	Narati	0.445235	76.5765	5.9387	51.6928	WestEuro	84.0129	43.3232	Asia
Nottingham	Narati	0.440368	75.7591	1.1333	52.95	WestEuro	84.0129	43.3232	Asia
NYC	Narati	0.482005	82.7517	-73.9484	40.809	EastAm	84.0129	43.3232	Asia
Pursat	Narati	0.371401	64.1768	103.917	12.5333	SEAsia	84.0129	43.3232	Asia
Qinghai	Narati	0.361224	62.4678	101.768	36.6407	Asia	84.0129	43.3232	Asia
Russia2	Narati	0.271136	47.3384	134.94	47.73	Russia	84.0129	43.3232	Asia
Russia3	Narati	0.15095	27.1544	106	52	Russia	84.0129	43.3232	Asia
SakhalinskayaOblast	Narati	0.340558	58.9971	142.6	50.55	Asia	84.0129	43.3232	Asia
Salvador	Narati	0.444271	76.4146	-38.501	-12.977	SouthAm	84.0129	43.3232	Asia
SanDiego	Narati	0.239058	41.9512	-117.161	32.715	WestAm	84.0129	43.3232	Asia
Sassenberg	Narati	0.352469	60.9974	8.0408	51.9897	WestEuro	84.0129	43.3232	Asia
Sihanouk	Narati	0.257733	45.0874	103.864	10.7153	SEAsia	84.0129	43.3232	Asia
Sonoma	Narati	0.394429	68.0441	-122.45	38.29	EastAm	84.0129	43.3232	Asia
Stockholm	Narati	0.434084	74.7039	18.0686	59.3294	Scand	84.0129	43.3232	Asia
Tarlac	Narati	0.322947	56.0395	120.465	15.4636	SEAsia	84.0129	43.3232	Asia
Turku	Narati	0.443621	76.3055	22.2667	60.45	Scand	84.0129	43.3232	Asia
UdonThani	Narati	0.374444	64.6879	102.75	17.4167	SEAsia	84.0129	43.3232	Asia
Vancouver	Narati	0.422044	72.6818	-123.12	49.282	EastAm	84.0129	43.3232	Asia
Yunnan1	Narati	0.10453	19.3586	102.715	25.0492	Asia	84.0129	43.3232	Asia
Zhejiang	Narati	0.140982	25.4804	121.579	29.8853	Asia	84.0129	43.3232	Asia
Nottingham	Netherlands	-0.00376701	1.17127	1.1333	52.95	WestEuro	5.9387	51.6928	WestEuro
NYC	Netherlands	0.0485286	9.95378	-73.9484	40.809	EastAm	5.9387	51.6928	WestEuro
Pursat	Netherlands	-0.0805351	-11.7211	103.917	12.5333	SEAsia	5.9387	51.6928	WestEuro
Qinghai	Netherlands	-0.0972782	-14.533	101.768	36.6407	Asia	5.9387	51.6928	WestEuro
Russia2	Netherlands	-0.190935	-30.2617	134.94	47.73	Russia	5.9387	51.6928	WestEuro
Russia3	Netherlands	-0.282402	-45.6225	106	52	Russia	5.9387	51.6928	WestEuro
SakhalinskayaOblast	Netherlands	-0.125288	-19.2369	142.6	50.55	Asia	5.9387	51.6928	WestEuro
Salvador	Netherlands	0.00180725	2.10741	-38.501	-12.977	SouthAm	5.9387	51.6928	WestEuro
SanDiego	Netherlands	-0.228126	-36.5075	-117.161	32.715	WestAm	5.9387	51.6928	WestEuro
Sassenberg	Netherlands	-0.108688	-16.4491	8.0408	51.9897	WestEuro	5.9387	51.6928	WestEuro
Sihanouk	Netherlands	-0.204558	-32.5494	103.864	10.7153	SEAsia	5.9387	51.6928	WestEuro
Sonoma	Netherlands	-0.0610905	-8.45561	-122.45	38.29	EastAm	5.9387	51.6928	WestEuro
Stockholm	Netherlands	-0.0119364	-0.200703	18.0686	59.3294	Scand	5.9387	51.6928	WestEuro
Tarlac	Netherlands	-0.137096	-21.22	120.465	15.4636	SEAsia	5.9387	51.6928	WestEuro
Turku	Netherlands	-0.000475807	1.72399	22.2667	60.45	Scand	5.9387	51.6928	WestEuro
UdonThani	Netherlands	-0.0846369	-12.41	102.75	17.4167	SEAsia	5.9387	51.6928	WestEuro
Vancouver	Netherlands	-0.0262484	-2.60425	-123.12	49.282	EastAm	5.9387	51.6928	WestEuro
Yunnan1	Netherlands	-0.348111	-56.6578	102.715	25.0492	Asia	5.9387	51.6928	WestEuro
Zhejiang	Netherlands	-0.319521	-51.8564	121.579	29.8853	Asia	5.9387	51.6928	WestEuro
NYC	Nottingham	0.0531262	10.7259	-73.9484	40.809	EastAm	1.1333	52.95	WestEuro
Pursat	Nottingham	-0.0809555	-11.7917	103.917	12.5333	SEAsia	1.1333	52.95	WestEuro
Qinghai	Nottingham	-0.0973915	-14.552	101.768	36.6407	Asia	1.1333	52.95	WestEuro
Russia2	Nottingham	-0.190045	-30.1122	134.94	47.73	Russia	1.1333	52.95	WestEuro
Russia3	Nottingham	-0.278718	-45.004	106	52	Russia	1.1333	52.95	WestEuro
SakhalinskayaOblast	Nottingham	-0.124525	-19.1088	142.6	50.55	Asia	1.1333	52.95	WestEuro
Salvador	Nottingham	0.00546825	2.72224	-38.501	-12.977	SouthAm	1.1333	52.95	WestEuro
SanDiego	Nottingham	-0.222965	-35.6407	-117.161	32.715	WestAm	1.1333	52.95	WestEuro
Sassenberg	Nottingham	-0.104776	-15.7922	8.0408	51.9897	WestEuro	1.1333	52.95	WestEuro
Sihanouk	Nottingham	-0.204682	-32.5703	103.864	10.7153	SEAsia	1.1333	52.95	WestEuro
Sonoma	Nottingham	-0.0566845	-7.71568	-122.45	38.29	EastAm	1.1333	52.95	WestEuro
Stockholm	Nottingham	-0.0103002	0.074093	18.0686	59.3294	Scand	1.1333	52.95	WestEuro
Tarlac	Nottingham	-0.135426	-20.9395	120.465	15.4636	SEAsia	1.1333	52.95	WestEuro
Turku	Nottingham	0.00298429	2.30508	22.2667	60.45	Scand	1.1333	52.95	WestEuro
UdonThani	Nottingham	-0.0824288	-12.0392	102.75	17.4167	SEAsia	1.1333	52.95	WestEuro
Vancouver	Nottingham	-0.0216157	-1.82623	-123.12	49.282	EastAm	1.1333	52.95	WestEuro
Yunnan1	Nottingham	-0.346353	-56.3624	102.715	25.0492	Asia	1.1333	52.95	WestEuro
Zhejiang	Nottingham	-0.319088	-51.7836	121.579	29.8853	Asia	1.1333	52.95	WestEuro
Pursat	NYC	-0.13036	-20.0887	103.917	12.5333	SEAsia	-73.9484	40.809	EastAm
Qinghai	NYC	-0.147116	-22.9027	101.768	36.6407	Asia	-73.9484	40.809	EastAm
Russia2	NYC	-0.239165	-38.3613	134.94	47.73	Russia	-73.9484	40.809	EastAm
Russia3	NYC	-0.327385	-53.1771	106	52	Russia	-73.9484	40.809	EastAm
SakhalinskayaOblast	NYC	-0.176156	-27.7797	142.6	50.55	Asia	-73.9484	40.809	EastAm
Salvador	NYC	-0.0467347	-6.0447	-38.501	-12.977	SouthAm	-73.9484	40.809	EastAm
SanDiego	NYC	-0.272044	-43.883	-117.161	32.715	WestAm	-73.9484	40.809	EastAm
Sassenberg	NYC	-0.15646	-24.4719	8.0408	51.9897	WestEuro	-73.9484	40.809	EastAm
Sihanouk	NYC	-0.253556	-40.7783	103.864	10.7153	SEAsia	-73.9484	40.809	EastAm
Sonoma	NYC	-0.10986	-16.6459	-122.45	38.29	EastAm	-73.9484	40.809	EastAm
Stockholm	NYC	-0.0626024	-8.70952	18.0686	59.3294	Scand	-73.9484	40.809	EastAm
Tarlac	NYC	-0.185966	-29.4272	120.465	15.4636	SEAsia	-73.9484	40.809	EastAm
Turku	NYC	-0.0500031	-6.5936	22.2667	60.45	Scand	-73.9484	40.809	EastAm
UdonThani	NYC	-0.134779	-20.8309	102.75	17.4167	SEAsia	-73.9484	40.809	EastAm
Vancouver	NYC	-0.0748344	-10.7638	-123.12	49.282	EastAm	-73.9484	40.809	EastAm
Yunnan1	NYC	-0.39108	-63.874	102.715	25.0492	Asia	-73.9484	40.809	EastAm
Zhejiang	NYC	-0.363882	-59.3063	121.579	29.8853	Asia	-73.9484	40.809	EastAm
Qinghai	Pursat	-0.0173073	-1.10268	101.768	36.6407	Asia	103.917	12.5333	SEAsia
Russia2	Pursat	-0.111621	-16.9417	134.94	47.73	Russia	103.917	12.5333	SEAsia
Russia3	Pursat	-0.216154	-34.4969	106	52	Russia	103.917	12.5333	SEAsia
SakhalinskayaOblast	Pursat	-0.0415999	-5.18237	142.6	50.55	Asia	103.917	12.5333	SEAsia
Salvador	Pursat	0.0834684	15.8215	-38.501	-12.977	SouthAm	103.917	12.5333	SEAsia
SanDiego	Pursat	-0.145515	-22.6338	-117.161	32.715	WestAm	103.917	12.5333	SEAsia
Sassenberg	Pursat	-0.0293862	-3.13121	8.0408	51.9897	WestEuro	103.917	12.5333	SEAsia
Sihanouk	Pursat	-0.127889	-19.6738	103.864	10.7153	SEAsia	103.917	12.5333	SEAsia
Sonoma	Pursat	0.0199033	5.14645	-122.45	38.29	EastAm	103.917	12.5333	SEAsia
Stockholm	Pursat	0.0665909	12.9871	18.0686	59.3294	Scand	103.917	12.5333	SEAsia
Tarlac	Pursat	-0.0523474	-6.9873	120.465	15.4636	SEAsia	103.917	12.5333	SEAsia
Turku	Pursat	0.0810638	15.4177	22.2667	60.45	Scand	103.917	12.5333	SEAsia
UdonThani	Pursat	0.00343677	2.38107	102.75	17.4167	SEAsia	103.917	12.5333	SEAsia
Vancouver	Pursat	0.0569391	11.3662	-123.12	49.282	EastAm	103.917	12.5333	SEAsia
Yunnan1	Pursat	-0.275178	-44.4094	102.715	25.0492	Asia	103.917	12.5333	SEAsia
Zhejiang	Pursat	-0.248828	-39.9842	121.579	29.8853	Asia	103.917	12.5333	SEAsia
Russia2	Qinghai	-0.106751	-16.1238	134.94	47.73	Russia	101.768	36.6407	Asia
Russia3	Qinghai	-0.219966	-35.1371	106	52	Russia	101.768	36.6407	Asia
SakhalinskayaOblast	Qinghai	-0.0273713	-2.79282	142.6	50.55	Asia	101.768	36.6407	Asia
Salvador	Qinghai	0.100777	18.7283	-38.501	-12.977	SouthAm	101.768	36.6407	Asia
SanDiego	Qinghai	-0.134088	-20.7149	-117.161	32.715	WestAm	101.768	36.6407	Asia
Sassenberg	Qinghai	-0.0125156	-0.297971	8.0408	51.9897	WestEuro	101.768	36.6407	Asia
Sihanouk	Qinghai	-0.111218	-16.8741	103.864	10.7153	SEAsia	101.768	36.6407	Asia
Sonoma	Qinghai	0.0382382	8.2256	-122.45	38.29	EastAm	101.768	36.6407	Asia
Stockholm	Qinghai	0.0846801	16.0251	18.0686	59.3294	Scand	101.768	36.6407	Asia
Tarlac	Qinghai	-0.031448	-3.47747	120.465	15.4636	SEAsia	101.768	36.6407	Asia
Turku	Qinghai	0.0963699	17.9882	22.2667	60.45	Scand	101.768	36.6407	Asia
UdonThani	Qinghai	0.0158681	4.46878	102.75	17.4167	SEAsia	101.768	36.6407	Asia
Vancouver	Qinghai	0.0746208	14.3357	-123.12	49.282	EastAm	101.768	36.6407	Asia
Yunnan1	Qinghai	-0.267613	-43.1389	102.715	25.0492	Asia	101.768	36.6407	Asia
Zhejiang	Qinghai	-0.237907	-38.1501	121.579	29.8853	Asia	101.768	36.6407	Asia
Russia3	Russia2	-0.159615	-25.0017	106	52	Russia	134.94	47.73	Russia
SakhalinskayaOblast	Russia2	0.0792886	15.1196	142.6	50.55	Asia	134.94	47.73	Russia
Salvador	Russia2	0.194826	34.5229	-38.501	-12.977	SouthAm	134.94	47.73	Russia
SanDiego	Russia2	-0.0303387	-3.29118	-117.161	32.715	WestAm	134.94	47.73	Russia
Sassenberg	Russia2	0.0832768	15.7894	8.0408	51.9897	WestEuro	134.94	47.73	Russia
Sihanouk	Russia2	-0.0172714	-1.09665	103.864	10.7153	SEAsia	134.94	47.73	Russia
Sonoma	Russia2	0.132125	23.9929	-122.45	38.29	EastAm	134.94	47.73	Russia
Stockholm	Russia2	0.174828	31.1645	18.0686	59.3294	Scand	134.94	47.73	Russia
Tarlac	Russia2	0.0555934	11.1402	120.465	15.4636	SEAsia	134.94	47.73	Russia
Turku	Russia2	0.190372	33.7749	22.2667	60.45	Scand	134.94	47.73	Russia
UdonThani	Russia2	0.111855	20.5889	102.75	17.4167	SEAsia	134.94	47.73	Russia
Vancouver	Russia2	0.168692	30.134	-123.12	49.282	EastAm	134.94	47.73	Russia
Yunnan1	Russia2	-0.172971	-27.2447	102.715	25.0492	Asia	134.94	47.73	Russia
Zhejiang	Russia2	-0.137584	-21.3019	121.579	29.8853	Asia	134.94	47.73	Russia
SakhalinskayaOblast	Russia3	0.187357	33.2686	142.6	50.55	Asia	106	52	Russia
Salvador	Russia3	0.28578	49.7978	-38.501	-12.977	SouthAm	106	52	Russia
SanDiego	Russia3	0.0692908	13.4406	-117.161	32.715	WestAm	106	52	Russia
Sassenberg	Russia3	0.178819	31.8347	8.0408	51.9897	WestEuro	106	52	Russia
Sihanouk	Russia3	0.088903	16.7342	103.864	10.7153	SEAsia	106	52	Russia
Sonoma	Russia3	0.224744	39.5472	-122.45	38.29	EastAm	106	52	Russia
Stockholm	Russia3	0.271186	47.3467	18.0686	59.3294	Scand	106	52	Russia
Tarlac	Russia3	0.160908	28.8268	120.465	15.4636	SEAsia	106	52	Russia
Turku	Russia3	0.280872	48.9734	22.2667	60.45	Scand	106	52	Russia
UdonThani	Russia3	0.21473	37.8656	102.75	17.4167	SEAsia	106	52	Russia
Vancouver	Russia3	0.259342	45.3578	-123.12	49.282	EastAm	106	52	Russia
Yunnan1	Russia3	-0.0545479	-7.35686	102.715	25.0492	Asia	106	52	Russia
Zhejiang	Russia3	-0.0245341	-2.31635	121.579	29.8853	Asia	106	52	Russia
Salvador	SakhalinskayaOblast	0.129958	23.629	-38.501	-12.977	SouthAm	142.6	50.55	Asia
SanDiego	SakhalinskayaOblast	-0.100354	-15.0494	-117.161	32.715	WestAm	142.6	50.55	Asia
Sassenberg	SakhalinskayaOblast	0.0158295	4.4623	8.0408	51.9897	WestEuro	142.6	50.55	Asia
Sihanouk	SakhalinskayaOblast	-0.0877463	-12.9322	103.864	10.7153	SEAsia	142.6	50.55	Asia
Sonoma	SakhalinskayaOblast	0.0654595	12.7971	-122.45	38.29	EastAm	142.6	50.55	Asia
Stockholm	SakhalinskayaOblast	0.112835	20.7534	18.0686	59.3294	Scand	142.6	50.55	Asia
Tarlac	SakhalinskayaOblast	-0.0119127	-0.196711	120.465	15.4636	SEAsia	142.6	50.55	Asia
Turku	SakhalinskayaOblast	0.1271	23.149	22.2667	60.45	Scand	142.6	50.55	Asia
UdonThani	SakhalinskayaOblast	0.0389135	8.33901	102.75	17.4167	SEAsia	142.6	50.55	Asia
Vancouver	SakhalinskayaOblast	0.102303	18.9847	-123.12	49.282	EastAm	142.6	50.55	Asia
Yunnan1	SakhalinskayaOblast	-0.242019	-38.8406	102.715	25.0492	Asia	142.6	50.55	Asia
Zhejiang	SakhalinskayaOblast	-0.208185	-33.1585	121.579	29.8853	Asia	142.6	50.55	Asia
SanDiego	Salvador	-0.227768	-36.4474	-117.161	32.715	WestAm	-38.501	-12.977	SouthAm
Sassenberg	Salvador	-0.111791	-16.9703	8.0408	51.9897	WestEuro	-38.501	-12.977	SouthAm
Sihanouk	Salvador	-0.208515	-33.2141	103.864	10.7153	SEAsia	-38.501	-12.977	SouthAm
Sonoma	Salvador	-0.0634747	-8.85601	-122.45	38.29	EastAm	-38.501	-12.977	SouthAm
Stockholm	Salvador	-0.0160459	-0.890846	18.0686	59.3294	Scand	-38.501	-12.977	SouthAm
Tarlac	Salvador	-0.140538	-21.7979	120.465	15.4636	SEAsia	-38.501	-12.977	SouthAm
Turku	Salvador	-0.00209107	1.45273	22.2667	60.45	Scand	-38.501	-12.977	SouthAm
UdonThani	Salvador	-0.0874068	-12.8752	102.75	17.4167	SEAsia	-38.501	-12.977	SouthAm
Vancouver	Salvador	-0.0275533	-2.82339	-123.12	49.282	EastAm	-38.501	-12.977	SouthAm
Yunnan1	Salvador	-0.351227	-57.181	102.715	25.0492	Asia	-38.501	-12.977	SouthAm
Zhejiang	Salvador	-0.322378	-52.3362	121.579	29.8853	Asia	-38.501	-12.977	SouthAm
Sassenberg	SanDiego	0.120477	22.0368	8.0408	51.9897	WestEuro	-117.161	32.715	WestAm
Sihanouk	SanDiego	0.0221261	5.51975	103.864	10.7153	SEAsia	-117.161	32.715	WestAm
Sonoma	SanDiego	0.167504	29.9345	-122.45	38.29	EastAm	-117.161	32.715	WestAm
Stockholm	SanDiego	0.213566	37.67	18.0686	59.3294	Scand	-117.161	32.715	WestAm
Tarlac	SanDiego	0.0912748	17.1326	120.465	15.4636	SEAsia	-117.161	32.715	WestAm
Turku	SanDiego	0.225526	39.6787	22.2667	60.45	Scand	-117.161	32.715	WestAm
UdonThani	SanDiego	0.139975	25.3113	102.75	17.4167	SEAsia	-117.161	32.715	WestAm
Vancouver	SanDiego	0.201995	35.7269	-123.12	49.282	EastAm	-117.161	32.715	WestAm
Yunnan1	SanDiego	-0.137751	-21.3299	102.715	25.0492	Asia	-117.161	32.715	WestAm
Zhejiang	SanDiego	-0.101819	-15.2956	121.579	29.8853	Asia	-117.161	32.715	WestAm
Sihanouk	Sassenberg	-0.0990406	-14.8289	103.864	10.7153	SEAsia	8.0408	51.9897	WestEuro
Sonoma	Sassenberg	0.0487507	9.99107	-122.45	38.29	EastAm	8.0408	51.9897	WestEuro
Stockholm	Sassenberg	0.0969395	18.0839	18.0686	59.3294	Scand	8.0408	51.9897	WestEuro
Tarlac	Sassenberg	-0.0298692	-3.21232	120.465	15.4636	SEAsia	8.0408	51.9897	WestEuro
Turku	Sassenberg	0.109296	20.159	22.2667	60.45	Scand	8.0408	51.9897	WestEuro
UdonThani	Sassenberg	0.0237919	5.7995	102.75	17.4167	SEAsia	8.0408	51.9897	WestEuro
Vancouver	Sassenberg	0.0832352	15.7824	-123.12	49.282	EastAm	8.0408	51.9897	WestEuro
Yunnan1	Sassenberg	-0.248752	-39.9714	102.715	25.0492	Asia	8.0408	51.9897	WestEuro
Zhejiang	Sassenberg	-0.217331	-34.6945	121.579	29.8853	Asia	8.0408	51.9897	WestEuro
Sonoma	Sihanouk	0.145683	26.2699	-122.45	38.29	EastAm	103.864	10.7153	SEAsia
Stockholm	Sihanouk	0.190078	33.7255	18.0686	59.3294	Scand	103.864	10.7153	SEAsia
Tarlac	Sihanouk	0.0724719	13.9748	120.465	15.4636	SEAsia	103.864	10.7153	SEAsia
Turku	Sihanouk	0.205853	36.3748	22.2667	60.45	Scand	103.864	10.7153	SEAsia
UdonThani	Sihanouk	0.131549	23.8962	102.75	17.4167	SEAsia	103.864	10.7153	SEAsia
Vancouver	Sihanouk	0.182388	32.434	-123.12	49.282	EastAm	103.864	10.7153	SEAsia
Yunnan1	Sihanouk	-0.154078	-24.0718	102.715	25.0492	Asia	103.864	10.7153	SEAsia
Zhejiang	Sihanouk	-0.12392	-19.0071	121.579	29.8853	Asia	103.864	10.7153	SEAsia
Stockholm	Sonoma	0.0469964	9.69645	18.0686	59.3294	Scand	-122.45	38.29	EastAm
Tarlac	Sonoma	-0.0775025	-11.2118	120.465	15.4636	SEAsia	-122.45	38.29	EastAm
Turku	Sonoma	0.0595048	11.7971	22.2667	60.45	Scand	-122.45	38.29	EastAm
UdonThani	Sonoma	-0.0292858	-3.11434	102.75	17.4167	SEAsia	-122.45	38.29	EastAm
Vancouver	Sonoma	0.0373844	8.08223	-123.12	49.282	EastAm	-122.45	38.29	EastAm
Yunnan1	Sonoma	-0.294589	-47.6693	102.715	25.0492	Asia	-122.45	38.29	EastAm
Zhejiang	Sonoma	-0.263698	-42.4814	121.579	29.8853	Asia	-122.45	38.29	EastAm
Tarlac	Stockholm	-0.12253	-18.7737	120.465	15.4636	SEAsia	18.0686	59.3294	Scand
Turku	Stockholm	0.0123167	3.87235	22.2667	60.45	Scand	18.0686	59.3294	Scand
UdonThani	Stockholm	-0.07091	-10.1047	102.75	17.4167	SEAsia	18.0686	59.3294	Scand
Vancouver	Stockholm	-0.0114152	-0.113164	-123.12	49.282	EastAm	18.0686	59.3294	Scand
Yunnan1	Stockholm	-0.333969	-54.2827	102.715	25.0492	Asia	18.0686	59.3294	Scand
Zhejiang	Stockholm	-0.305121	-49.438	121.579	29.8853	Asia	18.0686	59.3294	Scand
Turku	Tarlac	0.137035	24.8175	22.2667	60.45	Scand	120.465	15.4636	SEAsia
UdonThani	Tarlac	0.0550162	11.0433	102.75	17.4167	SEAsia	120.465	15.4636	SEAsia
Vancouver	Tarlac	0.114281	20.9962	-123.12	49.282	EastAm	120.465	15.4636	SEAsia
Yunnan1	Tarlac	-0.223243	-35.6874	102.715	25.0492	Asia	120.465	15.4636	SEAsia
Zhejiang	Tarlac	-0.196634	-31.2187	121.579	29.8853	Asia	120.465	15.4636	SEAsia
UdonThani	Turku	-0.0840934	-12.3187	102.75	17.4167	SEAsia	22.2667	60.45	Scand
Vancouver	Turku	-0.0249454	-2.38542	-123.12	49.282	EastAm	22.2667	60.45	Scand
Yunnan1	Turku	-0.348239	-56.6793	102.715	25.0492	Asia	22.2667	60.45	Scand
Zhejiang	Turku	-0.31692	-51.4196	121.579	29.8853	Asia	22.2667	60.45	Scand
Vancouver	UdonThani	0.0619807	12.2129	-123.12	49.282	EastAm	102.75	17.4167	SEAsia
Yunnan1	UdonThani	-0.27674	-44.6716	102.715	25.0492	Asia	102.75	17.4167	SEAsia
Zhejiang	UdonThani	-0.247241	-39.7176	121.579	29.8853	Asia	102.75	17.4167	SEAsia
Yunnan1	Vancouver	-0.326229	-52.983	102.715	25.0492	Asia	-123.12	49.282	EastAm
Zhejiang	Vancouver	-0.298347	-48.3004	121.579	29.8853	Asia	-123.12	49.282	EastAm
Zhejiang	Yunnan1	0.0279671	6.50068	121.579	29.8853	Asia	102.715	25.0492	Asia
