# Supplementary material for: Brown rat demography reveals pre-commensal structure in eastern Asia before expansion into Southeast Asia
Source: HighWire-hosted journal article supplement (doi:10.1101/gr.235754.118), 2019-03-25
Supplement: Supplemental_Table_S4.xlsx [file Supplemental_Table_S4.xlsx]

## Sheet: Sheet1
Table S4- Variation in likelihoods and parameter estimates when the mutation rate is either estimated as part of the model or fixed. All models were run under the best fit nine population topology with variable tip and ancestral branches.
Parameter	Units	Jointly Estimated	mu Fixed- 2.5x10-8	mu Fixed- 1.103x10-9
NAncestral	2N	48511	80438	157939
NEastern China	2N	34230	40733	63823
NAleutians	2N	12838	17521	35503
NWestern North America	2N	55548	33530	58557
NSE Asia	2N	7291	5215	5836
NIran	2N	333	252	324
NWestern Europe	2N	4198	3299	4207
NNorthern Europe	2N	3685	3002	3027
NWestern Europe Expansion	2N	2009	1555	1794
RAncestral		9.76058e-05	9.83325e-05	9.87642e-05
RPacific		3.39452e-05	2.93736e-05	5.58139e-05
RGhost		-3.67266e-05	-1.48062e-05	-1.20439e-05
REastern China		-5.12853e-05	-4.48743e-05	-5.13599e-05
RAleutians		-6.32639e-05	-1.64595e-05	-6.58243e-05
RWestern North America		-5.97247e-05	-2.96981e-05	-2.6205e-05
RSE Asia		-3.33642e-05	-3.23234e-05	-1.37486e-05
RIran		-2.02173e-06	-7.92251e-05	-3.20959e-05
RWestern Europe		-6.64541e-05	-6.64179e-05	-7.06093e-05
RNorthern Europe		-8.9047e-05	-3.63092e-05	-1.81432e-05
RWestern Europe Expansion		-2.57751e-05	-3.02095e-05	-6.03402e-05
TEastern China	gen	52619	69445	121039
TPacific	gen	48461	55854	81710
TAleutian - Western North America	gen	28732	27052	43623
TSE Asia	gen	2595	2614	3346
TIran	gen	2376	2001	2149
TWestern Europe	gen	2364	1998	2135
TNorthern Europe	gen	1640	1209	1376
TWestern Europe Expansion	gen	1389	934	1050
µ	mutations gen-1	9.29473e-08	fixed	fixed
Likelihood		-3.11949e+07	-3.12227e+07	-3.12344e+07
